# Supplementary material
Source: publisher figshare collection journal article supplement (https://geolsoc.figshare.com/articles/dataset/_/14806232)
Supplement: Supplementary file 1 [file 1]

## Sheet: La Cerradura XRF
sample reference	stratigraphic position (cm)	Mg (ppm)	± ppm	Al (ppm)	± ppm	Si (ppm)	± ppm	P (ppm)	± ppm	S (ppm)	± ppm	K (ppm)	± ppm	Ca (ppm)	± ppm	Ti (ppm)	± ppm	V (ppm)	± ppm	Cr (ppm)	± ppm	Mn (ppm)	± ppm	Fe (ppm)	± ppm	Co (ppm)	± ppm	Ni (ppm)	± ppm	Cu (ppm)	± ppm	Zn (ppm)	± ppm	Ga (ppm)	± ppm	As (ppm)	± ppm	Rb (ppm)	± ppm	Sr (ppm)	± ppm	Y (ppm)	± ppm	Ba (ppm)	± ppm	U (ppm)	± ppm
1550-1560	1555	15300	164	50300	141	165000	174	474	7.89	3150	12.5	22600	132	217000	341	3170	33.2	63.4	10.1	37.4	4.04	489	14.9	29500	88.4	46.8	13.7	39.5	2.54	33	2.18	58.5	2.16	15.2	1.17	5.47	0.733	97.9	1.35	758	3.44	27	0.826	261	19.1	10.1	1.39
1480-1490	1485	18300	187	62300	165	210000	209	465	8.39	2740	13	30400	160	145000	287	4230	36.3	104	11.1	56	4.35	433	13.8	38900	97.6	57.2	15.6	44.6	2.66	46.6	2.42	81.5	2.47	14	1.22	4.11	0.747	129	1.5	533	2.83	30.2	0.874	247	19	7.68	1.45
LCM-1	1450.22	15400	164	48600	139	159000	171	381	7.33	2570	11.3	22200	130	246000	363	3280	34.2	63.8	10.4	44.3	4.27	531	16	27800	88.3	49.1	13.8	45.5	2.76	30.6	2.19	60.6	2.26	12	1.2			96.9	1.37	748	3.5	24.6	0.831			10.3	1.45
LCM-2	1443.26	15400	165	48300	138	159000	171			2990	12.2	22400	130	239000	358	3260	34.2	60.5	10.3	47.5	4.22	540	16	28500	88.4	47.3	13.9	40.8	2.69	35.3	2.31	64.9	2.3	10.6	1.19	3.72	0.717	97.2	1.37	710	3.39	24.8	0.827	216	18.9	6.86	1.39
LCM-3	1436.3	14900	160	46600	134	153000	166	378	7.18	2710	11.4	21300	126	243000	360	3160	33.5	76.5	10.1	36.9	4.09	530	15.8	27300	86.4	48.9	13.6	39.5	2.61	34.2	2.23	55.3	2.12	10.7	1.16	5.03	0.739	95.6	1.35	718	3.4	25.5	0.828			6.98	1.38
LCM-4	1429.35	15300	164	50000	141	165000	175	557	8.39	2400	11	22600	132	230000	351	3420	34.3	83.5	10.5	46.2	4.29	561	16.3	28800	88.5			43.4	2.76	32.2	2.3	69.4	2.36	9.38	1.19	2.44	0.703	98.2	1.36	687	3.31	27.2	0.84			10.6	1.47
LCM-5	1422.39	16300	170	52300	145	176000	183	415	7.56	2220	10.7	24700	139	203000	330	3500	34.4	54.5	10.4	49.9	4.35	482	14.8	32700	91.5	63.7	14.6	41.7	2.64	42.6	2.39	63.5	2.19	10.7	1.2	4.03	0.712	107	1.4	657	3.19	26.1	0.828	256	19	6.39	1.36
LCM-6	1415.43	16100	170	53200	147	177000	184	398	7.58	2650	11.9	24900	139	201000	328	3730	34.8	87.5	10.5	47.5	4.21	459	14.5	31700	90.2	48.2	14.3	42.2	2.6	39.4	2.29	66.2	2.3	12.6	1.19	4.31	0.734	109	1.41	732	3.36	26.7	0.831			9.81	1.39
LCM-7	1408.48	16800	174	55300	150	185000	189	403	7.64	2870	12.5	25700	143	191000	322	3710	35	112	10.8	58.3	4.35	456	14.4	33100	91.8	56	14.5	46.7	2.76	39.9	2.33	63.4	2.22	12.5	1.18	3.13	0.701	112	1.42	673	3.21	26.8	0.835	242	18.6	8.3	1.42
1400-1410	1405	14900	161	46000	134	150000	165	358	6.95	2780	11.5	22100	127	238000	354	3160	33.3	59.8	10.2	39.2	4.11	508	15.3	28300	87	81.6	14.4	39.7	2.63	37.1	2.21	58	2.17	12.9	1.19	3.32	0.71	96.1	1.35	724	3.42	25.4	0.833	229	18.9	6.1	1.34
LCM-8	1401.52	17300	180	54400	152	182000	191	413	7.91	5860	18.2	25600	142	190000	320	3820	35	73.7	10.5	52.7	4.29	428	14	33100	91.5	81.2	14.9	50.5	2.83	36.5	2.24	70.6	2.29	10.9	1.17	5.68	0.775	110	1.4	670	3.2	27	0.834			7.05	1.39
LCM-9	1394.57	16800	174	55900	151	187000	190	399	7.58	2670	12.1	25900	144	176000	309	3760	34.7	78.3	10.5	53.1	4.28	427	13.8	33500	90.9	49.7	14.3	42.4	2.59	36.3	2.19	68.1	2.25	13.6	1.15	3.33	0.661	114	1.41	620	3.03	25.6	0.811	243	18	10.2	1.41
LCM-10	1387.61	16500	172	56200	151	187000	189	438	7.78	2700	12.1	26400	145	165000	297	3790	34.1	103	10.5	47.6	4.14	430	13.6	33500	89.5	58.1	13.9	43.4	2.58	35	2.12	77.9	2.33	13.1	1.1	5.57	0.705	112	1.37	561	2.84	26.3	0.801	228	17.7	9.31	1.37
1380-1390	1385	16100	172	55500	152	184000	190	395	7.67	2700	12.1	25600	143	196000	329	3790	35.8	87	11	56.7	4.41	429	14.3	33400	94			40.1	2.62	51.3	2.57	76.4	2.48	13.9	1.2	3.63	0.737	115	1.46	651	3.22	27.1	0.862	250	19.2	8.51	1.47
LCM-11	1380.65	17200	176	55400	150	183000	188	503	8.21	2280	11.1	25400	143	181000	313	3680	34.7	93	10.6	46.1	4.23	482	14.3	33600	90.9	60.6	14.6	42.1	2.57	36.7	2.2	77	2.39	8.61	1.13	3.61	0.716	107	1.37	535	2.83	26.9	0.816	252	18.7	7.31	1.33
LCM-12	1373.7	18100	181	59200	156	197000	197	460	8.02	2600	12.2	28300	152	157000	293	3940	34.9	102	10.7	47.2	4.18	447	13.5	36700	91.7	95	15.1	48.8	2.68	40.9	2.19	87.1	2.44	15.5	1.17	4.47	0.724	117	1.38	536	2.76	27.5	0.808	259	18.6	6.72	1.28
LCM-13	1366.74	18800	188	60600	161	203000	204	533	8.74	4070	15.6	29200	156	147000	285	4170	35.5	107	10.9	61.1	4.35	430	13.2	37500	92	91.9	15	52.4	2.74	41.5	2.24	79.4	2.34	13.5	1.15	5.5	0.735	120	1.4	559	2.81	29.9	0.822	264	18.5	4.49	1.25
1360-1370	1365	17800	182	60000	160	203000	203	461	8.33	2530	12.2	28100	153	176000	315	4080	37	97.8	11.3	67.5	4.61	451	14.4	36400	97.5	58.8	15.6	47.9	2.83	41.9	2.39	77.1	2.46	17.7	1.26	5.2	0.769	120	1.49	588	3.04	28.1	0.868	286	19.3	6.89	1.44
LCM-14	1359.78	18400	185	59000	158	196000	199	511	8.51	3830	14.9	28300	152	158000	294	3990	35.2	92.9	10.7	51.5	4.25	428	13.3	37000	92	88.7	15.2	46.1	2.69	40.5	2.27	78.2	2.34	12.3	1.17	6.59	0.719	116	1.39	570	2.86	27.6	0.807	264	18.8
LCM-15	1352.83	16400	170	52300	145	172000	180	474	7.92	3730	13.9	24700	138	195000	322	3640	34	86.9	10.4	53.2	4.22	470	14.4	30500	88	48.7	13.5	49.8	2.75	38	2.25	73.4	2.35	14.3	1.17	6.51	0.716	105	1.37	672	3.18	25.9	0.807			10.7	1.41
LCM-16	1345.87	16300	173	52600	147	174000	183	462	8.01	3910	14.4	24900	139	206000	332	3600	34.8	81	10.7	53.7	4.3	503	15.1	31500	90.5	65.4	14.6	44.7	2.71	37.3	2.27	79.3	2.47	10.4	1.16	5.03	0.762	108	1.4	751	3.42	26.2	0.831	286	19.7	7.74	1.4
1340-1350	1345	18600	185	60600	160	201000	201	489	8.3	3360	14	29200	153	145000	281	4070	34.8	83.9	10.4	70.3	4.3	389	12.9	35600	91.5	46.2	14.3	46.7	2.64	41.2	2.2	75.4	2.29	16.7	1.18	3.56	0.711	118	1.4	516	2.71	25.2	0.796	279	18.8	10.4	1.39
LCM-17	1338.91	16600	176	51700	147	172000	183	431	7.89	4950	16.3	24200	137	212000	337	3530	34.8	73.8	10.7	44.6	4.19	491	15.2	30100	89.1	65.8	14.1	48.4	2.82	40	2.32	64.8	2.26	13.2	1.2	5.73	0.756	101	1.37	748	3.42	25.9	0.825	239	19.3	9.41	1.42
LCM-18	1331.96	13700	152	38100	120	123000	146	392	7.06	4150	13.3	17000	109	292000	394	2490	31.1	45.3	9.52	26.3	3.8	721	18.8	21600	79.4	42.6	12.7	42.7	2.78	34.9	2.28	49.7	2.08	12.1	1.12	11.8	0.744	76.1	1.25	880	3.86	22.8	0.806	200	18.8	8.9	1.37
LCM-19	1325	13500	150	37200	118	121000	143	424	7.17	2880	11	16600	107	316000	413	2550	31.9	36.6	9.81	21.9	3.99	779	19.8	21500	81.2			40.1	2.84	33.4	2.32	52.4	2.2	11.3	1.14	3.8	0.725	74.2	1.28	1010	4.23	24.2	0.839			8.2	1.4
LCM-20	1318.04	14500	159	43400	130	143000	160	371	7.17	3410	12.6	19900	121	281000	387	2900	33.7	46	10.2	41.2	4.3	639	17.9	24900	85.5	51.1	13.7	36.5	2.69	34.1	2.36	57.3	2.27	9.17	1.2	4.2	0.744	86.3	1.34	1160	4.46	26.7	0.862	203	19.7	8.25	1.45
LCM-21	1311.09	15500	165	47800	138	158000	171	376	7.3	3370	12.9	21600	128	244000	362	3160	33.9	49.2	10.3	36.4	4.21	532	16	27600	87.9			44.3	2.78	31.3	2.19	61.8	2.26	11.6	1.2	5.66	0.741	95.2	1.37	805	3.63	25.2	0.829	198	18.6	11	1.47
1300-1310	1305	13900	154	40300	124	131000	151	404	7.28	2750	11	17700	113	315000	416	2670	33.2	44.2	10.1	29.7	4.13	712	19.5	23500	86.8			41.3	2.86	30.7	2.28	52.1	2.26	10.4	1.18	11.8	0.802	78	1.33	973	4.24	24.4	0.868			6.56	1.46
LCM-22	1304.13	15900	170	51000	145	170000	181	471	8.06	3990	14.5	23700	135	221000	345	3430	34.7	83.4	10.6	51	4.34	540	15.9	31400	91.9	55.2	14.6	45.5	2.81	35.4	2.28	60.7	2.21	7.81	1.13	6.6	0.769	102	1.39	742	3.45	26.3	0.84	240	19.3	7.59	1.44
LCM-23	1297.17	16100	171	51600	145	174000	182	504	8.2	3070	12.7	24500	138	205000	331	3460	34.1	77.6	10.6	48.6	4.31	534	15.5	31300	89.8	60.7	14.3	38.9	2.55	43.4	2.36	73.9	2.42	12.7	1.19	2.09	0.684	109	1.41	668	3.21	27.5	0.84	267	19.2	5.27	1.37
LCM-24	1290.22	16500	172	53300	147	179000	185	476	8.08	2860	12.3	24600	140	201000	330	3650	34.5	96.2	10.6	50.2	4.28	571	15.9	32400	91.1	72.8	14.4	41.5	2.64	36.6	2.25	61.7	2.21	10.3	1.16	2.51	0.7	108	1.4	653	3.17	27.4	0.839			8.36	1.39
1280-1290	1285	15100	162	46600	135	156000	168	436	7.64	3170	12.4	21200	127	252000	370	3020	33.6	59.2	10.4	36.4	4.23	570	16.8	27600	89.1	64.9	14	46.2	2.86	38.1	2.33	64.9	2.38	13	1.15	11.7	0.753	90.6	1.35	849	3.78	25.7	0.846	201	17.8	10.3	1.43
LCM-25	1283.26	17400	179	56500	155	191000	196	454	8.22	3510	14.2	26200	147	187000	320	3680	34.9	92.9	10.7	54.6	4.37	534	15.3	34000	92.8	68.9	14.8	42.9	2.64	36.2	2.2	61.3	2.16	11	1.16	3.88	0.72	114	1.43	586	3	26.3	0.831	235	19.1	7.4	1.39
LCM-26	1276.3	17600	179	58900	156	198000	197	378	7.54	3050	13.2	27700	151	150000	287	3930	34.6	112	10.7	50.2	4.16	405	13.1	35200	90.9	76.3	14.6	46.3	2.65	54.1	2.43	69.8	2.26	13.7	1.17	4.06	0.69	120	1.42	539	2.77	26.5	0.807	261	18.8	8.72	1.35
LCM-27	1269.35	18500	187	63100	166	215000	211	372	7.7	2730	13	29800	160	136000	276	4250	35.7	121	11	64.1	4.36	404	12.8	38000	92.2	74.1	14.7	45.3	2.57	51.9	2.35	72.2	2.23	14.6	1.18	3.46	0.66	128	1.43	583	2.83	27.2	0.805	299	19.3	10.1	1.36
LCM-28	1262.39	18500	189	62300	165	216000	212	412	7.99	2670	12.9	30400	159	140000	279	4410	36.4	100	11	71.4	4.51	387	12.6	38700	93.2	103	15.4	51.4	2.77	58.1	2.46	72.6	2.26	15.2	1.18	4.41	0.709	128	1.45	522	2.72	27.6	0.818	288	19.3	4.08	1.28
LCM-29	1255.43	18400	187	61900	165	215000	212	443	8.25	3650	15.1	29900	159	133000	273	4300	35.8	87.9	10.8	62.5	4.38	417	13	39000	92.7	90	15.2	45.2	2.57	46	2.25	81.6	2.33	14.8	1.15	5.7	0.692	126	1.42	480	2.57	29.4	0.818	292	18.7	5.72	1.28
LCM-30	1248.48	17100	173	57400	151	196000	193	373	7.01	1900	10.2	28700	151	106000	237	4200	32.8	119	9.93	68.9	3.98	344	11.2	37600	86.4	95.7	14.2	45.4	2.48	38.3	2	69.6	2.07	12.2	1.05	7.78	0.727	115	1.29	381	2.18	25.3	0.732
1240-1250	1245	17800	182	57600	156	197000	199	570	8.84	3770	14.8	27900	149	157000	292	4140	35.1	76.2	10.6	48.8	4.23	489	14	36600	91.3	120	15.5	43.6	2.64	39.3	2.1	71.2	2.22	15.8	1.15	5.33	0.728	112	1.38	522	2.76	30.8	0.829
LCM-31	1241.52	18600	188	63600	167	219000	214	417	7.94	3120	14	31300	162	116000	255	4490	35.7	100	10.7	66.7	4.29	393	12.4	40200	92.6	94.4	15.1	46.5	2.58	42.4	2.14	69.9	2.11	14.6	1.14	6.61	0.746	125	1.39	418	2.38	30.2	0.812	275	18.7	4.73	1.22
LCM-32	1234.57	19200	191	61700	164	215000	211	449	8.16	5050	17.7	31200	160	111000	248	4380	34.8	124	10.7	64.6	4.18	372	11.9	39300	90.7	90.4	14.7	43	2.48	42.3	2.12	71.7	2.15	15.6	1.13	5.47	0.678	124	1.37	456	2.46	28.3	0.788	269	18.2	5.99	1.21
LCM-33	1227.61	17400	178	59400	156	206000	201	553	8.64	2290	11.5	28700	153	144000	282	4170	35.3	108	10.8	58.1	4.26	491	14	37400	91.3	83.9	14.6	49.5	2.63	42.3	2.17	67.1	2.14	15.6	1.14	4.84	0.694	122	1.4	507	2.65	31	0.828	259	17.6	7.51	1.3
LCM-34	1220.65	16900	174	55600	151	193000	194	462	7.99	1620	9.47	27200	147	174000	307	3930	35.3	94.4	10.9	45.5	4.29	497	14.7	35500	93.6	68	14.5	45.2	2.62	37	2.23	58.5	2.15	15.2	1.24	4.22	0.703	114	1.41	511	2.77	30.9	0.854	256	18.4	9.29	1.39
LCM-35	1213.7	17100	176	57200	154	197000	197	405	7.6	1880	10.3	28200	151	157000	292	4140	35.5	98.7	10.8	65.1	4.34	467	13.8	36800	91.4	99	15.2	43.3	2.55	42.8	2.24	69.5	2.2	14.8	1.18	3.95	0.692	116	1.38	465	2.58	30.1	0.828	286	19.1	4.37	1.24
LCM-36	1206.74	17400	176	57200	153	193000	193	527	8.39	2280	11.2	28100	150	168000	302	3930	35.2	90.6	10.7	53.4	4.3	490	14.3	35600	91.2	109	15.2	48.8	2.82	41	2.29	80.9	2.41	12.4	1.14	5.52	0.757	113	1.39	1070	3.95	29.4	0.829	272	18.2	4.53	1.32
1200-1210	1205	18300	185	61500	163	215000	210	411	7.99	1660	10.1	29300	159	146000	288	4400	36.7	117	11.1	63.5	4.43	398	13.4	37600	96.3			41.7	2.65	44.8	2.27	83.3	2.45	20.3	1.26	6.25	0.751	123	1.47	457	2.61	28.7	0.855			10.1	1.47
LCM-37	1199.78	17900	182	57200	156	192000	196	512	8.46	4740	16.5	27800	149	163000	297	3940	34.9	105	10.7	55.7	4.3	465	14.2	35100	92	79	14.7	54.9	2.88	37.7	2.2	196	3.7	15.6	1.18	8.74	0.821	114	1.39	475	2.64	28.5	0.83	236	18.4	6.08	1.31
LCM-38	1192.83	18300	184	58600	158	198000	199	466	8.19	3320	13.9	28500	152	159000	295	4080	35.5	80.6	10.7	52.4	4.22	438	13.7	35600	92.5	71.9	14.7	62.5	3.02	49.5	2.36	173	3.51	13	1.15	7.41	0.801	118	1.42	502	2.72	29.4	0.84	232	18.2	6.5	1.37
LCM 39	1185.87	18500	184	58600	157	200000	200	458	8.21	3800	14.9	27900	153	161000	300	3950	35.6	105	11	56.5	4.34	397	13.3	35000	93.9			73.7	3.36	34.3	2.2	161	3.45	14.3	1.19	9.23	0.894	117	1.44	500	2.75	28.2	0.844	260	19	10.4	1.45
LCM-40	1178.91	17500	178	56300	153	190000	193	405	7.71	3070	13.1	27400	148	177000	309	3780	34.9	69.2	10.6	56.3	4.35	465	14.3	33800	91.6	55.1	14.3	68.9	3.16	41.2	2.3	167	3.49	12	1.19	5.53	0.825	114	1.42	588	2.97	27.2	0.829	274	19.1	8.4	1.41
LCM-41	1171.96	16900	174	52900	147	176000	184	439	7.87	3840	14.2	24500	138	210000	336	3460	34.4	85.6	10.6	49.7	4.31	511	15.3	31800	91.3	67.5	14.2	64.5	3.16	34.8	2.24	233	4.24	11.6	1.2	7.25	0.819	105	1.39	650	3.19	28.2	0.847	246	18.4	9.15	1.41
1160-1170	1165	16300	170	48600	140	162000	174	450	7.9	3150	12.6	22300	132	250000	370	3290	34.7	97	10.8	32.7	4.19	638	17.7	28600	90.9			43.3	2.83	38.6	2.38	119	3.18	15.2	1.22	4.41	0.778	95.8	1.4	751	3.58	27.5	0.885			9.4	1.47
LCM-42	1165	16300	169	46700	136	157000	170	520	8.15	2740	11.6	21800	128	249000	366	3280	34.4	80.6	10.4	48.2	4.25	629	17.3	28600	89.5	67.9	14.2	54.3	3.05	36.6	2.36	98.1	2.82	12.4	1.18	5.58	0.811	94.2	1.36	788	3.6	29.5	0.873			7.27	1.43
LCM-43	1158.04	14700	158	43300	129	145000	160	439	7.4	2510	10.7	20600	123	249000	363	2980	32.5	80	10.1	37.7	4.1	638	17.2	27800	87.1	50.5	14	45.6	2.77	35.6	2.27	118	3.02	9.32	1.13	5.62	0.761	89.5	1.32	737	3.45	26.5	0.836			5.53	1.34
LCM-44	1151.09	14600	158	42800	128	145000	160	396	7.16	2940	11.6	20400	122	247000	362	2950	32.4	51.4	9.82	39.9	4.14	603	17	27500	86.7	44.3	13.6	39.6	2.6	33.5	2.29	85	2.63	8.05	1.19	4.76	0.739	90.9	1.32	731	3.43	25.8	0.824			7.47	1.36
LCM-45	1144.13	15600	168	45600	136	154000	170	420	7.64	4530	15	21500	127	243000	360	3120	33.2	72.9	10.3	38.1	4.21	616	17	27600	87			42.7	2.7	36.6	2.28	146	3.36	7.97	1.14	3.18	0.728	93.6	1.34	715	3.4	25.2	0.823			7.48	1.39
1130-1140	1135	15600	165	46500	136	154000	168	441	7.68	3340	12.7	21700	127	252000	366	3040	33.6	45.2	10.3	34.5	4.29	709	18.3	27600	88.2	46.3	13.9	41.5	2.7	35.6	2.3	59.2	2.22	12.8	1.15	4.48	0.717	92.4	1.34	687	3.36	27.7	0.852	222	19	9.75	1.43
1100-1110	1105	18500	187	60800	163	207000	207	506	8.8	3530	14.7	28800	156	166000	308	4000	36.5	85.5	11.2	51.7	4.53	533	15.4	38600	99.5	57.8	15.8	46.8	2.79	37.1	2.29	66	2.26	11.4	1.23	5.74	0.752	125	1.51	574	3	28.6	0.88	300	19.9	7.42	1.48
1070-1080	1075	18200	184	61400	162	212000	208	580	9.04	2990	13.4	29900	160	137000	278	4220	35.8	101	10.9	68.3	4.41	413	13.5	37600	95.3			49	2.74	39.3	2.26	65.5	2.21	16.9	1.21	5.85	0.748	121	1.44	438	2.54	29	0.84	235	18.1	9.38	1.42
1040-1050	1045	17800	179	54800	150	185000	190	519	8.33	3200	13.2	27200	146	168000	300	3690	33.9	109	10.5	49.6	4.11	453	13.9	33900	90.4	49	14.1	49	2.75	39.8	2.22	66.6	2.2	16.8	1.16	5.39	0.724	111	1.37	509	2.72	28.3	0.821	233	18.3	10.3	1.36
1000-1010	1005	17300	178	55600	153	187000	193	441	8.15	3370	13.8	25800	146	201000	335	3610	35.5	85.6	10.9	49.1	4.34	472	15	32700	93.5	46.5	15.2	42.3	2.76	37.8	2.32	67.4	2.36	13.2	1.22	4.22	0.774	114	1.47	658	3.25	28.2	0.874	244	18.9	6.01	1.43
950-960	955	17200	176	54900	151	184000	189			2010	10.5	25800	143	212000	341	3600	35.4	79.6	10.9	45.7	4.38	422	14.4	32900	94.6	64.8	14.9	40.8	2.73	39	2.37	65.1	2.33	9.9	1.18	2.72	0.726	112	1.47	683	3.34	27.1	0.874	244	19.3	11.6	1.47
940-960	945	17500	177	57200	152	196000	194	393	7.37	2650	12.1	27800	149	132000	266	3830	33.1	105	10.2	56.8	4.05	391	12.1	36000	87.5	90.8	14.1	39.2	2.36	32.9	1.93	69.8	2.14	15.3	1.07	6.88	0.674	116	1.33	439	2.41	26.6	0.768	257	17.9	5.2	1.17
920-930	925	16700	172	52300	146	175000	183			1860	9.86	23700	137	236000	359	3410	35.4	95.2	11	46.6	4.37	519	16.1	29300	91.2	49.8	14.1	41.2	2.7	40.5	2.45	57	2.21	11.6	1.26	5.02	0.743	103	1.43	703	3.43	27.3	0.874	228	18.7	8.77	1.44
900-910	905	19900	194	65500	170	225000	217	444	8.37	1980	11.2	30800	163	145000	288	4470	36.9	141	11.4	64.1	4.45	398	13.4	38100	97.3	57.8	15	52.1	2.81	34	2.21	74.3	2.35	11.4	1.23	4.65	0.733	130	1.51	473	2.67	28.8	0.862			10.7	1.44
880-890	885	18600	185	61800	161	211000	206	457	8.13	2670	12.6	30200	158	136000	274	4180	35.2	99.3	10.7	53.9	4.19	395	12.6	38300	92	102	15.2	47.6	2.64	40.6	2.16	78.9	2.31	17.9	1.16	5.26	0.701	124	1.41	542	2.75	27.6	0.807	271	19
860-870	865	17800	181	58600	157	198000	198	485	8.4	2620	12.2	27400	150	191000	326	3880	36.2	110	11.2	57.4	4.47	472	15	34400	95.6	73.5	15	41.9	2.72	38.6	2.31	65.3	2.31	15.1	1.23	5.96	0.746	117	1.48	537	2.93	26.5	0.857	251	19.4	9.31	1.46
830-840	835	17200	177	54300	151	183000	190	467	8.22	3160	13.2	25400	142	217000	345	3630	35.4	86.2	10.9	48.8	4.45	515	15.8	32200	94.1	64.8	14.8	44.6	2.76	37.4	2.31	61.1	2.26	14.7	1.2	2.74	0.71	107	1.44	644	3.25	27	0.86			8.21	1.43
810-820	815	15400	162	46700	135	154000	167			2800	11.5	21300	126	249000	365	3070	33.2	70.5	10.1	40.2	4.2	540	16.1	26700	86.7			34.6	2.52	38.2	2.37	54.2	2.18	12.2	1.14	4.65	0.728	94	1.35	698	3.38	24.8	0.828			7.71	1.4
790-800	795	16600	172	49700	142	166000	178			2640	11.6	22300	132	247000	368	3160	34.4	82.3	10.6	48.8	4.34	487	15.6	28600	90.5	66.1	14.6	39.3	2.7	41.5	2.47	60.5	2.25	10.5	1.2	8.52	0.709	99.2	1.41	769	3.61	24.9	0.853	240	19	7.85	1.43
780-790	785	17400	177	51900	147	175000	184			4040	14.7	24200	138	230000	355	3400	35.1	65.1	10.7	46.7	4.39	455	15.2	30600	93	47.9	14.2	46.2	2.84	38.9	2.42	62.3	2.26	11.7	1.21	7.35	0.817	107	1.45	722	3.47	26.5	0.871	214	19.1	11.3	1.53
770-780	775	17200	176	56500	153	191000	193			2610	12	26300	146	186000	320	3640	34.9	81	10.7	47.2	4.25	360	13.2	33500	93.2	55.5	14.6	44.5	2.68	40	2.3	61.4	2.2	15	1.17	5	0.733	118	1.47	614	3.09	24.2	0.826	250	18.3	10.4	1.46
760-770	765	17900	182	57100	156	195000	198	402	7.84	3620	14.5	27300	148	176000	311	3820	35.1	105	10.8	54.9	4.23	377	13.2	34000	93	78.7	14.8	44.4	2.71	40.5	2.34	68.4	2.3	11.9	1.21	5.15	0.745	114	1.43	523	2.83	26.1	0.835	246	18.4	9.4	1.41
750-760	755	18800	189	61600	165	211000	210	399	8.1	4020	15.8	28300	154	165000	305	4040	36.2	90.7	11	52.5	4.31	394	13.6	35800	95.4	66.7	14.9	47	2.73	39.2	2.35	66.7	2.28	17.3	1.26	4.08	0.7	123	1.48	502	2.77	26.5	0.846	251	18.6	8.41	1.43
730-740	735	16600	171	52400	145	176000	182	353	7.03	4930	16	24600	139	153000	284	3420	31.8	100	9.88	49.6	3.91	341	12	29800	83.2			42.6	2.42	27	1.91	70.4	2.19	9.19	1.1	5.54	0.683	107	1.3	478	2.55	22	0.738	237	17.1	11	1.34
710-720	715	17600	178	53800	150	183000	189	519	8.51	2680	12.1	24900	141	213000	342	3550	35.3	73.9	10.8	52.5	4.43	476	15.2	31400	92.7	60.7	14.8	43.9	2.78	43.6	2.47	60.8	2.26	12.6	1.22	2.59	0.741	107	1.43	601	3.13	29.7	0.882	231	18.7	7.13	1.42
690-700	695	17100	177	49600	144	170000	182			5030	16.4	23400	136	241000	364	3220	34.6	81.5	10.7	37.4	4.28	490	15.9	32500	96.3			46	2.9	34.9	2.38	54.2	2.21	9.11	1.23	5.03	0.83	101	1.43	688	3.42	26.1	0.868	184	18.7	8.98	1.44
680-690	685	15200	161	40100	124	135000	154	330	6.74	5540	15.8	18800	116	252000	364	2700	30.9	52.4	9.43	34.4	3.93	516	15.4	23600	80.2	47.9	12.6	38.1	2.55	35.2	2.19	49.9	1.99	12.3	1.1	8.14	0.639	83.4	1.26	720	3.37	24.4	0.796			9.15	1.33
670-680	675	15100	159	41500	126	140000	157	424	7.38	2530	10.6	18800	117	282000	391	2670	32	67.1	9.95	38.7	4.12	659	18.4	24700	85.9			35	2.62	30	2.21	44.5	1.99	9.56	1.15	8.7	0.68	83.5	1.31	785	3.68	25	0.843			7.44	1.41
660-670	665	15200	161	43000	129	146000	161	391	7.35	1720	8.91	19000	119	287000	395	2730	33.2	48.5	10.3	27.2	4.15	625	17.9	24900	87.1	45	13.6	42.3	2.82	37.5	2.34	50.7	2.13	13.7	1.17	2.44	0.706	85.5	1.34	814	3.79	25.3	0.866	182	18.2	7.21	1.42
640-650	645	14900	160	40800	125	137000	156	449	7.44	2400	10.4	19000	116	283000	388	2750	32.4	35.5	9.98	41.6	4.27	647	17.7	26000	86.5	85.8	14.5	41.6	2.76	33.1	2.2	54.5	2.15	14.4	1.13	5.43	0.772	80.5	1.29	721	3.53	26.6	0.854	157	18.5	4.97	1.3
630-640	635	15900	165	44500	132	150000	165	469	7.78	3150	12.2	20300	123	256000	371	2860	32.7	51.4	10.1	40.2	4.16	661	17.9	26800	87.6	55.2	13.6	36	2.56	37.3	2.36	57	2.25	12.4	1.16	3.21	0.714	91	1.34	680	3.37	27.5	0.856	174	18.2	7.26	1.37
620-630	625	17400	177	50200	144	172000	183	542	8.62	2740	12.1	23500	135	245000	365	3300	34.5	90.9	10.8	42.8	4.36	616	17.4	30300	93.2	69.9	14.8	39.9	2.69	45.5	2.41	54.8	2.2	16.6	1.19	2.79	0.715	104	1.44	642	3.31	30.5	0.904			9.12	1.43
610-620	615	17400	175	50400	143	173000	181			2170	10.6	24400	136	198000	324	3390	33.3	54.4	10.1	41.5	4.15	456	14.4	31700	89	66.5	14.7	38.7	2.56	45.4	2.3	55	2.05	13.3	1.09	5.73	0.705	105	1.37	521	2.82	25.7	0.812	240	18.8	5.2	1.29
600-610	605	18200	180	54300	150	188000	191			2090	10.7	25100	142	197000	329	3570	34.8	71.4	10.6	53.8	4.29	422	14.2	30900	90.7	45.3	13.9	45.7	2.74	38.2	2.35	61.3	2.19	9.3	1.16	3.17	0.698	110	1.42	528	2.87	27.1	0.843	235	18.4	9.3	1.43
580-590	585	18600	183	55800	153	196000	197	424	7.94	2670	12.3	26400	147	175000	311	3710	34.8	93.3	10.7	50	4.31	442	14.1	34600	93.9	56.2	14.6	45.3	2.68	36.3	2.23	66.6	2.28	10.9	1.14	4.19	0.723	108	1.4	582	2.98	26.8	0.83	245	18.9	11.1	1.41
570-580	575	15800	162	44100	129	150000	162	523	7.86	1800	9.11	20800	123	235000	352	2870	31.5	67.1	9.69	30.7	3.9	611	16.7	27400	85.5	44.8	13.3	38.4	2.58	37.3	2.25	59.7	2.18	12.7	1.1	3.27	0.647	89.7	1.29	639	3.16	27.5	0.822			5.96	1.31
560-570	565	17200	172	49900	141	171000	178	419	7.65	1640	9.11	23400	135	233000	357	3150	33.9	60.6	10.4	43.5	4.29	567	16.6	30100	92.3			39.5	2.66	41.6	2.48	51	2.09	12.7	1.26	3.17	0.678	102	1.42	627	3.23	25.7	0.852	220	19	8.94	1.43
550-560	555	18200	179	55000	150	191000	191	359	7.31	2020	10.5	26000	144	185000	318	3750	34.7	112	10.8	53	4.32	401	13.9	33400	92.9	58.9	14.3	42.6	2.66	43.3	2.36	57.5	2.17	9.67	1.14	3.01	0.707	112	1.42	546	2.9	26.7	0.836			7.1	1.39
540-550	545	18100	179	54600	149	190000	191	355	7.27	1740	9.75	26000	144	186000	318	3770	34.6	89.5	10.5	49.1	4.18	416	13.8	32200	90.6			43.9	2.62	41.8	2.33	58.4	2.09	12	1.18	3.59	0.695	108	1.39	539	2.85	27.2	0.829			7.59	1.37
530-540	535	19200	186	57700	156	202000	200	436	8.04	1840	10.3	27100	150	177000	314	3950	36	80.2	11	53.8	4.41	462	14.7	35000	95.1	58.7	15.3	41.5	2.69	45.3	2.37	61.5	2.2	14.6	1.25	4.24	0.706	116	1.46	596	3.05	27.7	0.862	243	19.4	8.04	1.47
520-530	525	19000	187	57100	156	204000	203	498	8.54	2860	13	27000	150	173000	311	3870	35.6	69.7	10.7	62.2	4.46	465	14.5	35600	95.5	66.2	15.1	41.9	2.73	40.4	2.32	67.4	2.33	15	1.21	3.65	0.707	114	1.44	599	3.04	26.9	0.843	238	18.7	11	1.44
510-520	515	18400	180	54800	149	193000	192	477	8.07	1860	10.1	26000	144	174000	307	3710	34.2	77.9	10.4	51.7	4.22	478	14.3	32800	90	46.2	14	43.4	2.64	36.2	2.16	58.6	2.09	10.7	1.15	5.76	0.721	107	1.36	569	2.89	28.1	0.823	225	17.8	8.73	1.37
500-510	505	18300	181	54400	150	193000	194	566	8.72	1950	10.4	26100	145	183000	316	3730	34.9	71	10.6	55.3	4.33	494	14.9	33900	93.3	60.2	14.6	42.2	2.63	28.7	2.14	59.7	2.22	11.8	1.18	4.33	0.71	110	1.41	593	3.03	30.2	0.86	215	18.6	8.19	1.37
490-500	495	18800	183	55300	151	197000	195	553	8.72	2040	10.7	26200	147	182000	318	3710	35	102	10.7	56.8	4.27	492	15	33400	92.6	69.1	14.6	37.2	2.52	38.7	2.28	69.9	2.32	9.88	1.14	3.34	0.691	110	1.42	604	3.05	27.5	0.843	195	18	5.51	1.35
480-490	485	18100	179	52600	147	188000	190	624	8.95	2630	11.9	25700	143	177000	310	3740	34.2	89.4	10.3	49.7	4.16	498	14.7	33700	91.2	46.1	14.4	41.5	2.6	31.6	2.09	64.3	2.15	9.95	1.14	4.52	0.718	108	1.37	560	2.89	27.8	0.824			7.16	1.36
470-480	475	19700	190	58900	159	213000	207	553	8.88	2500	12.2	28200	153	150000	290	4090	35.5	94.8	10.8	64.6	4.36	421	13.6	36500	94.4	74.1	14.8	47.4	2.72	38	2.23	65.1	2.21	12.2	1.2	4.47	0.717	117	1.42	497	2.72	29.5	0.849	238	17.9	11.1	1.4
460-470	465	19500	189	58300	158	211000	206	482	8.37	1900	10.6	27600	152	151000	290	4100	35.4	110	10.8	65.1	4.32	431	13.8	36200	94	57.9	14.6	45.5	2.62	37.7	2.24	62.3	2.16	12.1	1.19	5.63	0.73	116	1.41	492	2.7	27.8	0.83	212	17.4	6.65	1.36
450-460	455	18500	181	53900	148	193000	192	619	8.92	1710	9.69	24900	143	163000	298	3550	33.3	98.7	10.3	49.1	4.07	466	14	32400	87.9	51.5	13.6	44.5	2.57	38.8	2.18	58.1	2.09	10.5	1.08	2.83	0.635	105	1.32	500	2.67	28.2	0.804	215	17.7	11.4	1.35
445-450	447.5	20000	193	60100	162	218000	212	591	9.26	3670	15.1	28700	157	144000	285	4130	35.6	117	11	60.7	4.32	428	13.7	37100	95.1	62.1	14.8	47.6	2.71	48.4	2.33	62.3	2.13	18.7	1.17	6.53	0.717	121	1.45	468	2.63	28.3	0.841	223	18.3	10.1	1.38
435-445	440	20800	198	63300	167	229000	219	599	9.46	1990	11.3	29500	160	137000	280	4280	36.2	122	11	59.1	4.26	375	13	37400	95	86	15.1	39.9	2.57	47.8	2.34	70.8	2.28	12.5	1.18	3.97	0.712	125	1.47	506	2.73	29.4	0.849	225	18.2	12.1	1.43
425-435	430	19800	189	59000	157	211000	206	417	7.82	1830	10.4	28100	152	142000	279	4030	34.7	112	10.7	59.9	4.22	387	12.7	33600	88.9	51.6	13.6	46.1	2.55	42.3	2.24	63.2	2.1	11.3	1.11	4.1	0.683	116	1.38	496	2.64	25.4	0.79	239	17.7	11.8	1.41
415-425	420	19500	189	57400	157	205000	203	424	8.05	3930	15.2	26700	150	163000	302	3950	35.1	109	10.7	58.9	4.29	390	13.3	35400	94.5	56.4	14.4	46.2	2.73	37.3	2.28	62.1	2.2	10.3	1.17	8.75	0.801	110	1.4	547	2.87	27.8	0.83			12.7	1.46
395-405	400	15900	166	43000	131	154000	167	500	7.99	2980	11.9	20500	123	264000	377	2920	33.4	66.3	10.3	38.4	4.13	713	18.6	26700	88.3	43.2	13.8	37.3	2.69	35.6	2.28	47.9	2.06	11.4	1.1	9.49	0.698	87.1	1.34	768	3.62	31	0.893	192	17.5	10.4	1.44
385-395	390	15600	163	41300	127	146000	162	364	7.05	4530	14.5	19500	120	237000	354	2730	31.2	37.4	9.32	35.8	3.89	569	16.1	24900	81.9	49.6	12.8	39.3	2.54	34.4	2.17	44.8	1.91	13.5	1.11	11.1	0.694	83.8	1.26	768	3.46	25.8	0.799	184	17.7	10.5	1.35
375-385	380	18400	182	52300	148	189000	193	366	7.59	3240	13.5	24900	142	196000	329	3480	34.4	74.2	10.4	49	4.21	503	15.3	31800	92.3			39.8	2.57	32.3	2.23	52.9	2.08	12.9	1.21	3.37	0.702	107	1.42	740	3.42	28.1	0.858	191	17.9	11.8	1.45
365-375	370	19200	189	54700	154	199000	200	459	8.27	4200	15.7	25800	145	173000	309	3730	34.3	113	10.7	48.2	4.22	533	15.4	34300	93.1	65.9	14.6	44.1	2.71	39.5	2.3	53.2	2.06	11	1.16	3.42	0.694	111	1.42	671	3.2	29.6	0.857			10.2	1.4
355-365	360	18100	179	52600	147	191000	191	373	7.17	2440	11.5	26100	142	135000	267	3660	32	68.7	9.65	51.4	3.93	436	12.7	35300	86.5	116	14.6	37.2	2.36	44.6	2.17	59.4	1.96	13	1.07	3.55	0.619	112	1.32	468	2.51	26	0.759	224	17.7
345-355	350	19000	187	56000	155	205000	203	520	8.68	2610	12.4	26400	148	174000	311	3800	35.2	74.6	10.7	49.7	4.32	556	15.7	35800	95.8	73.2	15.2	45.3	2.7	32.1	2.22	70.6	2.39	13	1.21	5.31	0.717	114	1.45	710	3.32	31.6	0.878	202	17.7	11.4	1.43
335-345	340	20200	192	58800	159	217000	209	409	7.85	1720	10.2	27800	153	138000	278	4080	34.9	83.1	10.5	61.6	4.22	466	14	37300	94.1	81	14.8	45.4	2.64	41.2	2.19	65.1	2.18	14.9	1.22	4.72	0.697	121	1.43	470	2.61	29.7	0.84	254	17.7	8.22	1.36
330-335	332.5	21900	201	58300	160	220000	213	432	8.08	4000	15.8	27300	153	115000	253	4130	34	103	10.3	50.3	3.93	402	12.3	37800	89.2	73.1	14.1	37.2	2.32	35.7	2.05	60.3	1.99	12.5	1.07	3.35	0.616	116	1.33	473	2.48	29.2	0.779	218	17.5	6.49	1.2
325-330	327.5	22000	207	63200	170	239000	228	460	8.7	2830	13.9	29800	162	122000	266	4420	36.3	89.9	11	75.4	4.49	443	13.5	41300	96.8	98.3	16	40.5	2.54	53.3	2.37	69.6	2.2	22.8	1.22	5.23	0.733	128	1.45	444	2.53	31.1	0.851	237	18.1
320-325	322.5	21500	200	61700	165	233000	221	434	8.2	1360	9.38	28700	159	118000	259	4350	35.6	110	10.8	65.4	4.27	413	13.2	37800	94.1			51.8	2.76	41.1	2.28	58.3	2.08	13.1	1.15	3.88	0.672	127	1.45	428	2.47	29.4	0.838	243	18.4	10.1	1.46
310-320	315	21600	199	58500	159	222000	213	474	8.27	1450	9.44	28000	153	117000	254	4440	35.2	55.6	10.4	59.6	4.19	436	12.8	41200	93.3	120	15.9	35.6	2.38	51.3	2.29	58.5	1.97	16.7	1.12	4.79	0.665	120	1.37	424	2.42	32.2	0.822	204	17.6
300-310	305	21800	204	61600	167	235000	224	468	8.67	3040	14.2	28100	159	122000	266	4290	36	135	11.1	55.9	4.35	438	13.4	41000	96.3	51.5	15.3	51	2.71	41.3	2.19	60	2.03	14.2	1.15	6.49	0.752	125	1.42	442	2.49	30.4	0.834	248	18	3.94	1.31
295-300	297.5	21500	203	59500	164	227000	220	4900	25	1770	10.8	27200	155	129000	273	4320	36.1	124	11.1	67.7	4.44	501	14.2	38400	93.8	60.6	15	48.5	2.67	48.6	2.3	55.8	2.02	14.5	1.1	5.26	0.695	120	1.41	779	3.32	58.5	1.02	282	18.7	8.71	1.38
290-295	292.5	21100	198	59500	161	228000	216	440	8.1	1790	10.6	28000	154	112000	249	4390	35	78.1	10.5	59.2	4.12	379	12	39700	91.3	108	14.7	45.4	2.53	44	2.15	58.6	1.96	15.4	1.14	6.2	0.683	120	1.35	419	2.35	34.8	0.829	226	17.4	5.61	1.2
285-290	287.5	21900	205	64500	172	248000	232	392	8.09	2040	11.8	30200	166	93500	235	4730	36.5	103	10.9	68.4	4.31	345	11.7	43000	96	80.7	15.4	46.7	2.58	44.7	2.24	60.8	2.08	16	1.18	6	0.723	132	1.43	451	2.47	30.7	0.827	248	17.9	5.28	1.3
280-285	282.5	20200	195	62000	166	234000	221	394	7.89	2730	13.3	29100	159	101000	240	4530	35.4	80.8	10.5	61.8	4.12	313	11.2	38500	90.4	85.2	14.8	50.3	2.61	41.3	2.11	56.5	1.94	16.5	1.15	6.97	0.719	126	1.39	441	2.43	30.4	0.808	251	17.8
275-280	277.5	15900	167	42200	130	153000	167	492	8.02	3070	12.2	18300	118	260000	374	2880	32.5	73.8	10	38	4.14	666	17.9	26500	86.1	58.4	13.7	41.9	2.76	33.4	2.26	40.3	1.95	10.2	1.13	2.42	0.685	85.8	1.3	844	3.74	31.1	0.877			7.42	1.38
270-275	272.5	16700	171	47000	138	169000	178	443	7.88	2070	10.2	20200	127	235000	360	3130	33.5	78.8	10.3	47.4	4.26	581	16.7	29900	91.5	45.9	14.6	37.5	2.59	34.7	2.24	48	2.04	13.8	1.19	4.13	0.707	92.5	1.36	734	3.49	32.1	0.898			6.72	1.4
260-270	265	17600	177	50700	144	185000	188	481	8.24	2200	10.8	22900	136	211000	342	3360	34.5	99.4	10.7	51.7	4.36	547	16.1	31900	93.4	48.3	14.7	43.3	2.72	34.5	2.25	50.1	2.05	10.2	1.19	10.7	0.736	100	1.39	685	3.33	32.2	0.895	209	18.2	8.17	1.44
250-260	255	16100	167	46600	135	169000	176	488	7.89	1990	9.95	21300	127	210000	333	3300	32.7	68.5	9.8	54.6	4.17	546	15.5	29400	86.7	61.9	13.8	41.1	2.59	31.2	2.1	56.2	2.07	8.8	1.11	3.62	0.671	92.8	1.29	708	3.28	30.8	0.84			9.9	1.37
240-250	245	16200	169	43800	133	159000	172	668	9.07	2810	11.8	19300	122	258000	375	3040	34	70.9	10.5	42.8	4.23	670	18.3	27300	89.2	46	14.2	42.1	2.72	39.9	2.33	42.8	1.99	11.9	1.19	3.07	0.674	90.7	1.36	818	3.74	32.9	0.919	187	18	6.12	1.41
230-240	235	17500	176	50600	144	183000	187	710	9.54	1340	8.43	22800	135	220000	348	3510	34.9	87.2	10.7	52.2	4.42	586	16.7	31100	92.7	46.8	14.7	45.5	2.77	38	2.34	52.2	2.09	14.2	1.2	3.94	0.708	104	1.42	629	3.22	35.2	0.929			5.84	1.44
225-230	227.5	17600	177	50500	144	183000	187	636	9.04	1580	9.16	23000	134	212000	337	3520	34.7	80.4	10.6	49.3	4.29	549	15.9	31600	91.5	59.1	14.5	45.2	2.77	39	2.31	51.7	2.06	9.05	1.16	10.3	0.708	100	1.37	610	3.1	34.7	0.898	225	18.9	9.5	1.42
220-225	222.5	17000	172	48300	139	173000	179	462	7.82	2070	10.3	21700	129	209000	335	3260	33.3	70.2	10.1	52.9	4.19	528	15.5	29300	88.2	47.7	13.6	37.1	2.49	36	2.19	47.6	1.96	13	1.14	4.25	0.662	98.1	1.35	626	3.13	30.7	0.855	187	17.2	9.99	1.38
210-220	215	17700	178	49500	144	180000	187	472	8.17	3200	13.2	22500	134	208000	337	3470	34.1	93.1	10.5	56.4	4.33	552	15.9	30800	90.8	48.2	14.6	43.2	2.71	34.1	2.23	50.8	2.05	12.9	1.17	3.98	0.701	99.7	1.38	667	3.26	33.5	0.898			8.6	1.42
200-210	205	16300	168	43000	131	156000	169	472	7.91	4630	15	18700	119	242000	359	2850	32.1	61.1	9.88	43.8	4.15	588	16.6	27000	86.1			35	2.51	30.4	2.1	45.7	1.95	10.8	1.09	7.66	0.752	84	1.27	747	3.46	27.7	0.831	175	17.5	7.4	1.38
195-200	197.5	16400	171	45300	137	163000	176			3470	13.3	20000	124	251000	368	3150	33.8	78.4	10.4	43.9	4.22	572	16.9	26900	88.2	47.3	14.1	45.8	2.82	33.3	2.24	48.5	2.08	7.28	1.15	9.16	0.714	93.1	1.37	854	3.8	29.9	0.886			8.26	1.47
190-195	192.5	17800	181	50500	146	183000	190	381	7.78	4060	15	21800	134	216000	345	3400	34.6	60.6	10.3	48.7	4.37	537	16	30500	91.3			44	2.77	35	2.24	41.6	1.91	14.2	1.19	12.3	0.747	103	1.41	731	3.45	29.1	0.872			8.89	1.44
185-190	187.5	16400	169	47000	137	169000	177			1560	8.79	21500	127	211000	333	3510	33.8	53.9	10.1	52.7	4.31	475	14.5	31000	89	59.1	14.5	41.7	2.67	35.9	2.22	41.5	1.85	12.5	1.16	4.51	0.698	98.6	1.35	726	3.36	29.4	0.844			6	1.31
180-185	182.5	17100	174	50200	143	181000	186	356	7.37	1560	9.07	21900	133	215000	344	3520	34.9	81.2	10.5	54.1	4.35	483	15.3	30400	91.2			42.8	2.7	33.2	2.2	43.1	1.89	12.1	1.16	8.69	0.695	102	1.4	749	3.47	29.7	0.876			8.25	1.46
175-180	177.5	19000	185	56800	155	202000	200	410	7.87	1970	10.6	24800	144	174000	312	4000	35.9	88.5	10.8	44.3	4.24	432	14.1	34900	95.2			40.5	2.59	31.4	2.19	47.2	1.99	12.4	1.21	7.61	0.753	123	1.49	793	3.51	31.8	0.893			8.16	1.54
165-175	170	19200	189	57000	157	201000	202	381	7.75	3450	14.3	24400	142	165000	301	3760	34.7	78.7	10.5	48.2	4.25	426	13.6	36100	93.4	67.8	15	47.5	2.68	35.7	2.16	45.8	1.9	11.7	1.16	4.05	0.677	121	1.45	546	2.84	31.3	0.862	202	17.9	7.64	1.38
160-165	162.5	19100	186	57600	156	206000	202	432	7.99	1070	7.85	25700	147	169000	307	4000	35.9	90.3	11	50.2	4.32	438	14	36700	96.6			41.8	2.62	36.6	2.28	44.3	1.9	13.9	1.17	3.83	0.665	123	1.49	555	2.92	32.9	0.9	202	17.9	7.48	1.43
150-160	155	18800	184	56400	154	200000	199	371	7.6	3090	13.3	25000	144	170000	308	3890	35.3	74.7	10.6	61.9	4.4	424	14.1	34700	93.8	54.5	14.7	47.2	2.72	39.3	2.28	42.6	1.87	11.6	1.18	5.85	0.762	124	1.48	592	3	30.5	0.878	206	18.1	7.29	1.45
140-150	145	18800	181	56400	152	200000	196	364	7.31	1510	9.14	25200	143	160000	295	3870	34.4	76.7	10.3	53.3	4.2	406	13.1	34600	91.1	53.8	14.2	40.2	2.48	43.4	2.3	42.7	1.84	11.5	1.14	1.87	0.621	120	1.42	521	2.74	31.2	0.853	187	16.7	7.8	1.42
130-140	135	19800	192	62200	165	216000	211			2760	13.1	26800	152	137000	279	4260	35.7	122	10.9	73	4.46	349	12.2	38100	93.8	63	14.9	38	2.5	39.8	2.21	47.1	1.86	12.4	1.15	3.51	0.645	135	1.49	873	3.52	32.1	0.863			6.22	1.42
120-130	125	19500	189	59700	160	209000	206	360	7.55	2450	12.1	26500	150	146000	286	4090	35.5	92.7	10.7	64.7	4.37	398	13.2	36700	94.8	49.3	14.7	44.9	2.65	37.6	2.17	43.8	1.86	12.4	1.14	3	0.663	128	1.48	530	2.8	31.7	0.875	185	17.5	8.13	1.45
110-120	115	19300	185	60500	158	207000	201			1690	9.85	26800	148	124000	259	4200	33.9	90	10.1	59.9	4.06	323	11.2	38100	89.7	102	14.6	41.7	2.46	36.9	2.01	44.9	1.75	18.4	1.14	5.52	0.644	135	1.43	592	2.8	26.8	0.786			4.31	1.26
105-110	107.5	18500	182	65300	164	218000	207			2950	13.2	31300	162	64100	188	4430	32.6	86.9	9.68	65.9	3.81	217	9	38500	84.9	78.7	13.5	40.7	2.3	35.9	1.89	44.6	1.64	14.7	1.06	4.1	0.563	156	1.45	329	1.97	22.9	0.73	219	16.3
100-105	102.5	20100	197	70100	178	246000	231			2670	13.5	31800	170	90300	231	4590	35.8	136	10.9	78.6	4.37	260	10.5	41400	94	58.4	14.9	50.9	2.63	41.7	2.18	47.7	1.82	16.8	1.18	7.99	0.723	156	1.54	430	2.39	24.7	0.798	290	18.6	4.72	1.35
90-100	95	18900	188	56900	156	205000	204	545	8.79	2940	13.2	26700	148	149000	286	3780	33.8	100	10.4	57.3	4.27	442	13.2	36200	90.2	81.4	14.5	55.4	2.82	44.7	2.26	63	2.1	12.8	1.1	3.93	0.689	113	1.35	628	2.95	30.6	0.819	228	18.3	5.54	1.24
80-90	85	19300	190	58000	159	211000	209	756	10.3	3220	14	26400	151	157000	299	3810	34.9	95.1	10.7	64.8	4.46	437	14.1	36400	95.2	65.2	15.3	54.4	2.9	32.8	2.18	62.7	2.19	15.2	1.2	7.85	0.782	116	1.44	785	3.45	32.9	0.884	263	18.9	7.94	1.43
70-80	75	19900	193	60500	163	219000	213	453	8.26	1540	9.77	28900	157	134000	276	4130	35.3	87.5	10.8	66.3	4.42	381	12.7	40600	96.2	97.5	16	53.3	2.84	45.3	2.27	70.4	2.24	15.3	1.16	6.77	0.747	122	1.44	538	2.79	29.9	0.839	274	19.1
65-70	67.5	20200	194	61300	163	226000	216	474	8.32	2000	11.2	29300	158	109000	246	4320	34.3	108	10.4	63.6	4.23	357	11.6	39900	91.2	87.7	14.7	48.5	2.56	40.5	2.11	77.6	2.27	14.4	1.14	7.28	0.715	125	1.37	521	2.61	28.4	0.785			3.6	1.21
60-65	62.5	21800	202	64300	169	232000	221	495	8.64	2840	13.6	30100	163	104000	244	4340	35	115	10.7	71.9	4.3	338	11.7	40000	92.9	85.1	15.1	66	2.96	40.7	2.16	77.4	2.27	16	1.17	10.3	0.767	129	1.42	529	2.67	28.4	0.81	276	18.8	4.82	1.28
55-60	57.5	20900	198	63600	168	232000	221	470	8.48	1830	10.9	29300	161	117000	260	4330	35.7	119	10.9	71.8	4.43	363	12.2	40500	95	76.4	15.4	55.1	2.79	39.5	2.14	69.8	2.22	15.2	1.15	7.22	0.736	126	1.42	519	2.69	28.8	0.818	250	17.6
50-55	52.5	20600	192	59900	159	215000	207	459	7.98	1940	10.7	28200	153	108000	242	4040	33.1	105	10	49	3.86	340	11.3	37600	87.6	93.6	14.1	50.2	2.59	41.8	2.13	74.4	2.16	12.9	1.09	6.16	0.658	120	1.32	517	2.57	28.2	0.77	251	17.6	4.65	1.19
40-50	45	22200	200	61500	163	216000	210	526	8.65	2300	11.8	28900	156	124000	264	4190	34.4	138	10.8	58	4.21	374	12.4	38000	91.7	84.5	15.2	48.5	2.67	42.5	2.17	76.3	2.26	17.4	1.18	5.97	0.702	119	1.38	628	2.96	29.8	0.818			4.65	1.28
30-40	35	22700	204	62200	165	221000	214	541	8.9	2750	13.1	29500	159	123000	265	4240	35.3	102	10.8	69.7	4.42	380	12.5	38600	92.8	79.3	15.2	51.1	2.74	38.4	2.11	77.6	2.28	16.1	1.14	5.25	0.696	123	1.41	561	2.8	28.5	0.815	229	18	5.47	1.29
25-30	27.5	24300	204	60100	158	210000	202	518	8.29	2010	10.8	28700	154	111000	246	4000	33.1	100	10	53.9	3.89	344	11.4	35400	85.4	74.9	13.5	54.5	2.66	30.1	1.88	77.9	2.2	13.6	1.09	6.98	0.686	119	1.32	452	2.39	27.4	0.756	223	17.4	5.85	1.2
20-25	22.5	25400	214	64800	168	227000	217	555	8.99	1960	11.1	30500	163	117000	259	4400	35.4	121	10.9	67.3	4.38	356	12.4	37700	93.7	52.4	14.8	54.7	2.81	36.9	2.13	81.5	2.37	14.7	1.21	7.2	0.774	129	1.46	478	2.61	26.7	0.821			8.55	1.43
10-20	15	24200	214	65800	173	225000	221	526	9.15	6460	20.6	31100	166	121000	265	4380	36.1	113	11	68.1	4.39	330	12.3	42400	100	65.9	16	72.7	3.22	44.3	2.22	83.5	2.47	19.5	1.24	11.3	0.88	128	1.48	516	2.76	25.7	0.825	232	17.8	9.84	1.47
0-10	5	21300	193	58900	155	199000	197	505	8.21	2710	12.4	27700	149	134000	267	3890	33.3	97.5	10.2	58.5	4.04	322	11.4	31300	83.8	58.9	13	50.2	2.6	35.4	2.08	75.9	2.27	13.7	1.12	4.89	0.664	117	1.36	484	2.54	26	0.776	276	17.9	12.4	1.34
0-(-6)	-3	10700	133	18400	83.5	64900	102	393	6.69	3210	10.7	8000	70.2	441000	527	1130	24.6			14.4	3.81	784	21.6	14900	73.1	67.1	12.6			24	2.32	57.8	2.48			10.8	0.847	38	1.05	2060	6.57	22.3	0.852
-6-(-10)	-8	11000	134	20000	86.4	71000	107	419	6.84	1550	7.38	8730	73.4	425000	514	1180	24.8					755	21.3	11900	66					27.8	2.22	35.5	1.97	7.89	1.14	6.14	0.703	38.6	1.04	1300	5.17	24.1	0.871			6.97	1.42
-10-(-14)	-12	13300	147	27100	101	97900	127			1680	8.03	12200	88.9	386000	470	1740	28.2	44.7	8.99	24.8	3.87	584	18.6	15300	73.3	41.2	11.9	33.4	3.12	28.7	2.33	47.9	2.24	5.73	1.15	5.89	0.702	57.2	1.2	1360	5.19	22.9	0.864			4.52	1.44
-40-(-50)	-45	18400	180	51000	143	174000	181	417	7.57	2930	12.3	24800	137	206000	331	3490	34	61	10.3	58	4.27	422	13.9	29200	86.5	68.2	14.2	46.3	2.77	45.3	2.39	77.1	2.39	12.2	1.18	11.9	0.733	104	1.38	800	3.53	25	0.819	253	18.9	8.3	1.39
-50-(-60)	-55	17500	171	46800	135	157000	168	527	8.15	2660	11.3	21300	127	245000	364	3020	33.2	70.7	10.2	55.6	4.34	469	15.4	25500	85.6			46	2.86	28.7	2.18	73.7	2.46	13.6	1.19	6	0.757	93.9	1.36	971	4.02	24.2	0.833	210	18.7	7.87	1.48
-60-(-70)	-65	15100	157	36200	117	120000	143			3320	11.8	16100	107	320000	419	2340	31.1	45.8	9.58	27.9	4.03	489	16.2	20900	81.3			46.3	2.96	34.1	2.34	66.5	2.46	8.32	1.05	5.62	0.77	68.8	1.24	1020	4.3	20.3	0.805			11.1	1.45
-70-(-80)	-75	13000	146	27700	101	94100	124	347	6.54	3520	11.6	12900	90.2	361000	446	1810	28.2			23.5	3.85	520	16.9	15800	71.6	46.5	11.2	28.7	2.86	39.3	2.39	46.4	2.11	13.2	1.15	6.34	0.661	57.1	1.15	1130	4.54	20.6	0.794			8.66	1.39
-80-(-90)	-85	11900	140	22200	91.5	79400	113			2020	8.59	10400	80.5	419000	501	1410	26.4			21.3	3.84	547	18.3	14200	72	39.6	11.6	37.2	3.38	39.1	2.52	57.2	2.48			7.02	0.729	45.9	1.13	1370	5.32	18.5	0.818			5.5	1.46
-90-(-100)	-95	11200	136	20800	88.5	76600	111	323	6.39	1870	8.21	9580	76.8	419000	504	1300	25.5			15	3.67	572	18.8	12500	67.4			25.9	3.09	28.6	2.24	41	2.13	10.1	1.1			42.3	1.08	1400	5.35	17.6	0.805			6.76	1.43
-100-(-110)	-105	13400	148	30400	106	108000	133			1680	8.09	14200	95.8	348000	435	2030	29.4	34.2	9.15	20.5	3.83	474	16.3	17100	74	47.7	12	36.7	2.98	34	2.3	47.7	2.14	7.7	1.07			62.7	1.19	1210	4.69	20.2	0.797			6.25	1.43
-110-(-120)	-115	16200	163	41100	125	144000	158			2370	10.3	18500	116	276000	385	2770	32.6	63.9	9.97	40.2	3.99	407	14.6	21600	80.1	44	12.6	40.9	2.72	37.2	2.37	57.6	2.31	6.25	1.15	7.24	0.667	85.1	1.32	1060	4.25	21.2	0.804	186	17.8	9.27	1.45
-120-(-130)	-125	16500	168	43600	131	153000	167	407	7.55	2680	11.3	19200	120	281000	390	2870	33.8	51.9	10.4	33.5	4.23	412	14.9	23000	83.8			49.2	3.01	41.2	2.44	66.4	2.44	10.4	1.14	8.36	0.696	87.2	1.36	1190	4.57	23.3	0.847	187	18.1	6.54	1.51
-130-(-140)	-135	16800	169	44400	131	153000	166	374	7.06	2650	11.2	20900	123	246000	359	3220	33.4	50.3	10	43	4.12	402	14.1	24800	82.2	56.9	13.4	44.4	2.79	40.9	2.36	74.1	2.42	15.4	1.21	2.85	0.671	93.7	1.35	966	3.95	21.7	0.799			5.43	1.36
-140-(-150)	-145	14700	156	37200	118	128000	148	384	7.06	2530	10.4	17200	111	311000	412	2520	31.8	41.5	9.73	35.5	4.12	433	15.5	21000	81.1	51.3	13.4	42.7	2.92	39.2	2.4	75.7	2.61	14	1.16	9.22	0.729	77.5	1.32	1370	4.98	22.8	0.848			6.42	1.5
-150-(-165)	-155	11300	136	20200	87.3	76500	111	288	6.23	1940	8.38	9160	75.4	433000	515	1180	24.5	24.3	8.03	14.6	3.66	538	18.4	12200	67.5					29	2.26	35.2	2.07					40.6	1.07	1560	5.73	17.5	0.811
-165-(-175)	-170	12100	141	25100	96.2	93500	123	366	6.57	1520	7.5	11900	85.7	375000	457	1670	27.1			19	3.61	461	16.1	15100	70.2	52.8	11.8			31.5	2.3	43.3	2.08	8.33	1.1	6.29	0.66	54.5	1.14	1260	4.88	20.1	0.8			5.31	1.36
-175-(-185)	-180	20800	191	53300	149	190000	193	454	8.1	2220	11.1	25200	143	201000	332	3660	35	98.4	10.7	59.1	4.39	381	13.7	30600	90.6	46.5	14.4	52.1	2.9	41.5	2.39	78.8	2.49	14.8	1.24	4.06	0.718	111	1.45	732	3.41	23.6	0.83			6.67	1.46
-185-(-195)	-190	20100	186	52200	146	183000	187	482	8.12	2550	11.7	24600	140	195000	326	3570	34.2	79.4	10.4	47.3	4.27	394	13.6	31200	90.2	59	14.6	48.7	2.8	38.9	2.26	78.2	2.45	13.4	1.14	4.32	0.708	105	1.39	740	3.4	25.5	0.831			7.9	1.4
-195-(-200)	-200	18500	177	48500	138	173000	178	442	7.56	2470	11.1	23200	133	185000	311	3250	32.1	76.1	9.8	53	4.06	343	12.2	28100	83.1	51.9	12.9	49.5	2.73	31	2.05	85.2	2.45	12.9	1.1	12.1	0.693	99	1.3	856	3.51	22.4	0.758	209	17.8	8.58	1.35
-205-(-215)	-210	14100	152	30900	108	106000	133	333	6.69	2590	10.2	14400	97.5	372000	456	2040	30.4	32.3	9.39	38.8	4.26	468	16.8	18400	79.9			37.2	3.18	35.8	2.5	68.7	2.64	9.87	1.15	9.42	0.765	62.6	1.24	1030	4.51	21.2	0.855			6.34	1.46
-215-(-230)	-222.5	11900	139	22000	90.9	81000	115	322	6.42	1540	7.49	9910	78.8	421000	503	1340	26.1			13.6	3.7	497	17.6	13300	69.9					29.2	2.27	47.9	2.28	8.97	1.1	6.86	0.714	42.9	1.08	1100	4.75	16.4	0.791			3.79	1.36
-240-(-250)	-245	16500	165	41800	127	151000	163			2350	10.4	19900	120	255000	365	2990	32.4	71.6	9.96	41	4.12	339	13.1	24600	82.3	73	13.6	39.1	2.68	46.4	2.47	86.8	2.65	13.1	1.13	2.66	0.689	90.1	1.32	919	3.88	21.3	0.794			6.87	1.37
-250-(-260)	-255	21100	192	53100	149	195000	195	525	8.56	2000	10.6	25500	144	194000	328	3530	34.6	82.7	10.5	57.1	4.37	364	13.4	31700	91.8	53.1	14.7	51.2	2.87	39	2.4	61.5	2.26	12.1	1.15	10.5	0.69	108	1.42	716	3.37	23.9	0.828	215	19.1	6.36	1.41
-260-(-270)	-265	15800	162	39700	123	140000	156	439	7.5	2130	9.74	17800	114	297000	402	2670	32.4	64.5	10.1	34.5	4.01	415	15.1	21700	82.2			41.3	2.77	36.6	2.42	67.1	2.46	5.6	1.15	4.38	0.62	78.1	1.3	996	4.2	20.2	0.812			8.34	1.48
-270-(-290)	-280	11000	134	21600	88.9	83200	115	299	6.11	1890	8.21	10200	78.4	374000	462	1320	24.2	30.6	7.83	10.2	3.45	426	15.5	13500	66.5					25.8	2.07	45	2.06	8.14	1.03	4.82	0.622	42.8	1.02	1250	4.77	17.7	0.743			6.78	1.31
LC1	-280	11200	136	21000	88	81400	114	310	6.19	2740	9.9	9840	77.3	388000	473	1320	24.6			14.5	3.63	475	16.5	13500	67.4					24.7	2.13	42	2.03	5.34	1.08	5.26	0.657	43.1	1.03	1250	4.86	17.6	0.761			7.39	1.34
LC2	-290	10700	133	17600	81.6	74600	109	298	6.17	2110	8.67	8860	73.5	424000	508	1200	24.4					464	17	12600	67.7	43.6	11			33.9	2.42	71.1	2.71			6.17	0.679	39	1.03	1270	5.08	16.3	0.776			6.14	1.4
LC3	-300	11700	139	21500	90.1	91100	122	323	6.54	1370	7.14	10400	81.4	401000	488	1370	25.7	27.8	8.37	17.4	3.75	455	16.5	13200	68.3					35.2	2.41	114	3.31	11	1.12			49.7	1.13	1370	5.23	18.4	0.808			4.52	1.45
LC4	-310	14300	156	36800	119	141000	157	390	7.22	2380	10.3	16600	109	299000	399	2550	31.5	48	9.63	40.5	4.1	385	14.4	20100	77.7	52.9	12.5	43.8	2.83	48.3	2.53	62.4	2.34	9.87	1.12	7.72	0.72	77.2	1.27	1120	4.4	21.7	0.81			6.94	1.42
LC5	-320	13700	150	33900	113	132000	149	399	7.19	1440	7.79	15300	104	327000	422	2200	30.1	59	9.48	38.2	4.07	371	14.6	18300	76.6	45.7	12.1	38.2	2.8	42.3	2.55	74.5	2.58	10.3	1.13			69.4	1.24	1030	4.32	18.1	0.785			8.54	1.4
LC6	-340	13800	150	32000	110	120000	142			1830	8.62	15200	101	350000	437	2140	30.5	42.5	9.42	26.5	3.96	402	15.5	18200	78			36.2	2.98	36	2.44	57.6	2.36	3.73	1.14	7.61	0.727	65.2	1.24	1060	4.48	18.6	0.805			7.28	1.43
LC7	-350	11400	137	23000	92.2	93200	122	363	6.61	1700	7.89	10400	80.3	392000	471	1470	25.8			14.4	3.56	447	16.1	13900	68.7	36	11			28.8	2.38	58.6	2.42			4.63	0.688	46.6	1.08	1260	4.91	17.6	0.779			6.45	1.37
LC8	-360	11700	139	25200	97.1	99900	128	323	6.47	1680	8	11600	85.9	382000	464	1620	27.1			13.8	3.68	390	15.3	14600	70.9	39	11.4			28.1	2.31	41.8	2.12					52.2	1.14	1200	4.81	17.2	0.785			7.4	1.38
LC9	-375	10800	134	20800	88.4	93600	123	339	6.55	1310	6.96	9680	78.4	384000	475	1270	24.5	26.8	7.99			384	15	12700	66					26.4	2.13	41.4	2.07	10.1	1.05			41.7	1.02	995	4.37	16.3	0.75			6.03	1.31
LC10	-385	12600	144	28600	103	123000	142			1860	8.61	13200	92.7	335000	422	1860	27.8	32.8	8.72	17	3.59	400	14.6	16600	72.3					41.1	2.52	40	1.95	6.14	1.1	1.91	0.636	59.1	1.14	987	4.18	16.9	0.742			7.2	1.34
LC11	-395	15100	161	41200	127	161000	170	375	7.28	1730	9.08	18700	118	270000	380	2790	32.2	65.2	9.94	38.8	4.04	343	13.5	22400	81.2	48	12.8	50.2	2.96	37.4	2.32	56.3	2.19	7.76	1.1	3.55	0.723	84.2	1.32	928	3.96	19.6	0.786			10.6	1.41
LC12	-405	13400	150	33900	114	138000	154	373	7.17	1090	6.84	15300	103	322000	419	2080	30	57	9.47	32	3.93	397	14.9	17700	75.5			37.4	2.74	36.8	2.38	46.4	2.09	9.17	1.09	7.25	0.681	67.2	1.22	928	4.1	20.1	0.805	202	19.6	5.13	1.37
LC-13	-415	13500	149	35000	114	138000	151			1560	8.1	16100	106	289000	389	2370	29.6	47.7	9.12	28.8	3.7	335	13	18800	73.6	43	11.8	40.3	2.61	37.7	2.27	59.6	2.24	13.6	1.12	7.21	0.627	71.5	1.2	895	3.84	18.7	0.751			6.29	1.3
LC14	-430	13800	150	35300	115	141000	154			1180	7.06	16300	107	298000	398	2370	30	49.8	9.31	32.4	3.78	340	13.6	18700	75.4	46.8	11.9	41.1	2.73	36.4	2.23	57.1	2.22	13.1	1.1	7.97	0.668	73.2	1.24	886	3.9	19.2	0.78			7.57	1.35
LC15	-440	17100	167	40800	125	147000	161	402	7.3	1510	8.25	18000	116	287000	396	2670	32.7	55.3	10.2	38.2	4.22	415	15.1	23700	85.1			43.1	2.87	35.5	2.36	61.7	2.33	8.3	1.17	8.5	0.696	78.9	1.3	857	3.88	21.6	0.821	205	19.5	8.09	1.44
LC16	-450	24000	201	58000	153	191000	191	542	8.37	1690	9.56	27800	151	155000	291	3840	34.3	84.7	10.5	57.5	4.22	349	12.2	35600	90	68.2	14.3	50.6	2.69	37.5	2.07	82.3	2.36	14.9	1.14	6.82	0.698	120	1.4	579	2.83	25.1	0.787	252	18.7	5.26	1.29
LC17	-460	16600	164	40600	123	135000	152	457	7.53	1470	7.98	19000	119	299000	405	2680	32.8	64.4	10.2	35.9	4.23	475	16	21900	82.8			50.9	3.02	32.2	2.37	109	3.05	8.18	1.21	8.22	0.699	82.8	1.35	817	3.81	21.4	0.826			10.1	1.49
LC18	-470	21100	189	54700	148	180000	184	602	8.87	1520	8.87	26300	145	226000	353	3630	35.8	89.7	11	51.8	4.49	392	14.2	29800	91.5	45.8	14.8	51	2.99	40.8	2.45	82	2.61	8.6	1.22	8.32	0.705	107	1.46	741	3.52	26.5	0.874			9.8	1.51
LC19	-480	17400	168	43100	128	141000	156	460	7.45	1880	9.14	20400	121	267000	376	2900	32.8	66.9	10.1	44.2	4.11	427	14.6	24500	83.3			48.4	2.88	35.1	2.27	77.9	2.53	10.7	1.16	2.34	0.686	85.9	1.31	889	3.84	21.1	0.793	214	19	8.44	1.41
LC20	-490	13000	146	27200	101	95700	125	361	6.72	2050	8.83	13100	91.9	385000	468	1740	28.3	29.4	9.17	13.1	3.84	473	16.8	16500	76			25.6	2.95	30.8	2.35	67.2	2.58	9.01	1.14	7.47	0.703	54.9	1.17	977	4.38	19.9	0.822			8.27	1.43
LC21	-500	11900	140	21700	90.5	86000	118	349	6.66	2240	9.11	10600	82.3	401000	490	1370	26.2			13.2	3.67	508	17.6	15400	73.9					26.8	2.38	92.3	3			4.57	0.758	46	1.1	1170	4.86	20	0.822			6.01	1.42
LC22	-510	13500	148	29600	104	110000	134	366	6.64	2130	9.1	14100	94.9	331000	421	1970	28.3	46.9	9.01	20.7	3.72	445	15.5	17300	73.2	46.6	11.6	42.8	2.85	32.9	2.28	47.6	2.09	9.41	1.06			62.5	1.17	1060	4.31	20.4	0.777			7.31	1.36
LC23	-520	17400	172	45200	133	166000	173	406	7.55	1340	8.06	20500	127	248000	368	3000	33.6	49.3	10.2	42	4.24	364	13.7	23900	83.2			47.1	2.82	38.8	2.36	55.7	2.2	11.1	1.14	3.11	0.675	95.1	1.38	919	3.91	21.4	0.812	211	18.2	8.47	1.5
LC24	-530	20800	188	51200	143	186000	186	497	8.2	1960	10.1	23500	139	196000	329	3400	34	76.2	10.4	48	4.19	374	13.3	30100	88.9	49	14.2	45.1	2.72	37.5	2.23	80	2.48	12.5	1.13	2.45	0.69	105	1.39	890	3.73	23.2	0.81	251	19	6.32	1.44
LC25	-540	20800	186	50900	141	179000	181	470	7.72	1890	9.79	24400	138	174000	303	3330	32.1	60.9	9.71	45.4	3.92	336	12.1	30100	84.9	54.8	13.3	46.6	2.62	32.2	2.04	73.1	2.28	9.45	1.04	5.6	0.7	101	1.3	706	3.17	22.8	0.758	252	17.7	8.06	1.31
LC26	-550	19300	180	49200	139	170000	176	453	7.69	2200	10.4	23700	134	218000	342	3330	33.8	67.2	10.3	56.6	4.24	349	13.1	29600	89.3	69.9	14	46.8	2.82	33.9	2.23	78.5	2.51	11.7	1.12	5.36	0.721	100	1.38	723	3.4	22.5	0.806	235	19.1	7.85	1.39
LC27	-560	13200	147	29400	105	106000	132	570	7.79	1670	8.04	13500	93.9	355000	443	1900	28.7	26.3	8.92	24.3	3.81	445	15.9	16600	74.1			25.5	2.75	25.5	2.18	54.1	2.28			5.83	0.664	57.2	1.16	1150	4.63	18.3	0.782			7.24	1.39
LC28	-570	11700	139	23700	93.6	85500	117	536	7.44	2720	10	11100	83.1	382000	467	1500	26.1					474	16.3	14800	70	57.3	11.8	29.8	2.95	30.1	2.19	53.3	2.24	11.9	1.11	6.72	0.676	49.3	1.1	1160	4.69	17.9	0.773			4.95	1.33
LC29	-585	11900	140	22600	91.9	87900	119	299	6.24	2240	9.1	10300	80.2	396000	479	1440	25.8			22.2	3.64	462	16.6	13700	69.1					29.2	2.33	50.3	2.22	5.25	1.12	6.39	0.679	44.9	1.07	1300	5.05	17.9	0.782			5.69	1.37
LC30	-595	14400	153	35900	116	138000	153			1250	7.27	15700	107	302000	407	2190	30	45.2	9.28	30.8	3.93	368	14.2	18200	75.4			41.1	2.81	48.3	2.57	51.2	2.16	13.2	1.11	7.16	0.659	71.2	1.24	1150	4.49	19.9	0.794	188	18.6	8.82	1.45
LC31	-605	16300	166	45600	133	168000	174			1340	7.98	20800	125	245000	359	3010	32.9	62.5	10.2	39.2	4.04	351	13.2	23500	80.5	42.3	12.8	44.8	2.74	42.8	2.42	70.8	2.37	6.8	1.09	9.04	0.693	95.2	1.36	924	3.84	21.7	0.792	268	18.6	9.8	1.45
LC32	-615	14300	153	35800	116	134000	150	425	7.24	1550	8.08	15900	106	310000	409	2380	30.6	38.1	9.34	28.6	3.84	409	15.1	19000	77			40.8	2.83	33.7	2.35	65.3	2.46	4.41	1.1	7.04	0.664	71.8	1.24	984	4.18	19.2	0.787			6.95	1.39
LC33	-625	13900	150	35800	115	133000	149	410	7.09	1510	7.95	15900	106	302000	401	2350	30	47	9.08	32.4	3.78	358	13.8	18800	75.1	44.3	11.9	45	2.88	36.7	2.34	63.2	2.36	8.33	1.07	5.31	0.69	70.1	1.21	1010	4.14	23.1	0.803			10.1	1.39
LC34	-635	11800	140	24600	96.2	96400	126	433	7.19	1290	7.07	10700	83.1	395000	480	1520	27.1	28.8	8.64	12.4	3.63	476	17	13700	69.5					25.2	2.26	64.4	2.57	6.23	1.06	2.97	0.688	47.5	1.1	1120	4.72	19.8	0.815			5.48	1.37
LC35	-645	11700	139	25700	98.3	102000	129			1680	8.03	11900	87.7	378000	464	1610	27.1	26.3	8.54	25.1	3.86	383	15.4	14700	71.2			31.8	3.04	35	2.51	56.5	2.36	8.38	1.16	6.71	0.694	53.5	1.15	1290	5.01	17.2	0.794			5	1.42
LC36	-655	10800	134	19500	85.8	81700	115	309	6.28	1540	7.45	9510	76.7	418000	500	1240	24.6			11.4	3.53	446	16.7	12900	68.4					26.1	2.19	52.2	2.35			3.78	0.728	43.4	1.08	1130	4.77	16.8	0.786			5.57	1.34
LC37	-665	12200	142	26400	99	116000	137	344	6.62	1540	7.77	12500	89.9	349000	434	1740	27.3			15.8	3.7	369	14.3	15200	69.8					24.7	2.12	43.4	2.03	7.53	1.06	6.16	0.633	54.3	1.11	969	4.17	17.5	0.757			7.88	1.32
LC38	-675	12200	143	28300	104	133000	149	390	7.17	1430	7.73	13400	95.7	340000	432	1860	28.3	40.5	8.89	19.9	3.76	373	14.7	15600	72.2			35.5	2.94	30.2	2.2	102	3.06	9.47	1.06			59.6	1.18	1010	4.33	18.1	0.786			7.14	1.39
LC39	-690	14900	162	38400	125	163000	173			1470	8.42	18000	116	288000	395	2620	31.8	66.5	9.87	37.9	4.08	333	13.6	20500	79.2			44.5	2.89	32.6	2.27	62	2.32	14.5	1.24	6.88	0.668	82	1.32	943	4.07	21.6	0.831			4.96	1.4
LC40	-700	12200	142	27300	101	118000	139	583	7.85	1960	8.83	13100	92.1	333000	421	1880	27.5			22.8	3.65	363	14.1	16600	71.4					42.1	2.46	49.7	2.11	8.2	1.01			58.4	1.13	920	4.03	19.5	0.77			5.75	1.29
LC41	-710	14000	154	36000	118	148000	161			1820	9.06	16000	108	295000	400	2370	30.4	56.6	9.35	40.2	3.94	331	13.5	20100	77.9	47.8	12.6	46.2	2.88	35.8	2.22	54.7	2.19	11.4	1.06	7.59	0.669	71.4	1.23	924	4	17	0.753			9.39	1.4
LC42	-720	12200	142	27500	102	116000	138	385	7.01	1460	7.64	12600	91.6	357000	448	1710	27.6	34.4	8.99	10.3	3.7	397	15.4	15700	73					27.1	2.2	52.6	2.28	8.81	1.11			55.5	1.16	982	4.3	18.1	0.786			5.93	1.38
LC43	-725	12800	145	30800	107	127000	144			1330	7.34	14600	97.9	324000	414	1960	28.5	38.4	8.95	24.5	3.67	369	14.1	17100	72.4	42.1	11.5			32.6	2.3	59.8	2.3	7.42	1.04	2.92	0.636	66.5	1.2	1000	4.18	18.3	0.767	177	18.7	5.36	1.3
LC44	-730	14800	158	40200	125	151000	163			1790	9.04	18400	116	277000	385	2730	31.8	75.7	9.87	41.9	4.03	314	13	20900	78.5	41.9	12.4	45.4	2.87	31.8	2.25	63.7	2.35	11.3	1.14	6.96	0.642	82.3	1.3	1070	4.26	20.9	0.797			7.47	1.38
LC45	-740	11300	138	24500	95.7	101000	129	367	6.81	2320	9.43	11300	85.2	378000	463	1500	26.3			19.3	3.68	377	15	14600	70.8			33	3.11	29.9	2.21	54.7	2.31	8.96	1.07	7.23	0.689	51.3	1.13	1190	4.77	15.9	0.762			6.92	1.37
LC46	-748	13000	146	31100	107	120000	141			1830	8.57	14800	98.8	330000	420	2130	29.5	56.7	9.24	26.2	3.8	333	13.6	17900	74.8	37.7	12	50.1	2.99	36.7	2.42	62.6	2.4	11.8	1.18	3.81	0.72	65.1	1.2	1200	4.62	19.8	0.791			8.46	1.44
LC47	-760	12500	144	28000	103	112000	136	2120	13.5	1820	8.52	12900	92.5	357000	445	1830	28.4	40.3	8.94	22.8	3.81	350	14.5	16200	73.7			29.1	2.87	37.4	2.42	44.9	2.15	9.52	1.1	6.59	0.671	56.1	1.17	1220	4.81	27.4	0.883			7.38	1.45
LC48	-770	12400	142	27700	101	114000	136			1540	7.72	13000	91.2	338000	427	1820	27.5	38.2	8.58	23.7	3.7	335	13.7	15800	70.7	35.2	10.9	28.9	2.75	28.8	2.25	46.3	2.08			7.35	0.658	56	1.12	1060	4.33	17.1	0.748			10.6	1.38
LC49	-780	12400	145	28000	104	128000	148			1570	8.1	13500	95.4	354000	439	1900	28.8	35.5	8.93	28	3.88	345	14.4	17400	76	41.1	12.1	38.5	2.9	46	2.66	71.1	2.62	9.89	1.14	7.02	0.702	62.2	1.21	1080	4.51	19.5	0.81			7.2	1.42
LC50	-790	13100	148	30900	108	130000	148			1860	8.82	14300	98.2	324000	416	2010	28.8	38.9	8.93	21.1	3.79	361	14	18000	74.5					33.3	2.29	56.8	2.23	7.59	1.02	8.37	0.687	64	1.18	1040	4.26	19	0.778			7.12	1.34
LC51	-800	14600	156	38300	121	153000	163			1440	8.06	17000	113	273000	385	2510	30.8	57.8	9.49	39.6	4.06	334	13.4	21300	79.4			40.1	2.71	34.8	2.33	55.9	2.17	8.61	1.07	8.26	0.657	78.8	1.27	867	3.82	18.5	0.769			5.66	1.37
LC52	-810	16000	163	40100	124	161000	168	373	7.08	1170	7.33	18600	118	257000	368	2650	31.4	31.7	9.55	32.3	3.96	324	12.9	22100	78.6	40.3	12.4	46.2	2.77	33.6	2.22	56.3	2.12	10	1.15			83.6	1.27	786	3.56	20.7	0.775	191	18.2	8.67	1.39
LC53	-820	10600	133	23700	94.2	108000	133	484	7.39	1230	6.89	11200	85.1	373000	459	1490	26.1			15.4	3.52	381	15.1	13700	68.2			21.2	2.75	22.4	2.09	38.3	2.01	6.92	1.07	6.48	0.662	47.5	1.08	995	4.35	19	0.789			6.23	1.33
LC54	-830	11700	139	24500	96.1	108000	133			2200	9.25	12000	88.2	378000	460	1640	27.4			16.1	3.72	357	14.8	16200	74.5	42.3	11.8	31.6	3.04	30.7	2.35	76.4	2.73	10.2	1.15	8.46	0.731	51.5	1.13	1130	4.67	20	0.811			8.9	1.42
LC55	-840	13200	149	32400	110	137000	152			1480	7.92	14800	101	301000	399	2150	28.7	35.4	8.78	18.2	3.53	305	12.9	17500	72.1	45	11.4	36.7	2.58	33.5	2.22	53.7	2.13	9.68	1.04	7.61	0.65	66.9	1.17	941	3.97	18.9	0.756			8.73	1.33
LC56	-850	14900	163	39100	126	158000	171			3670	13.4	17600	116	292000	400	2520	32.2	51.2	10	38.9	4.21	315	13.4	24400	87.1			54.8	3.17	39.5	2.37	83.4	2.7	14	1.16	7.55	0.846	83.5	1.35	913	4.05	19.6	0.815	202	19.2	8.84	1.48
LC57	-870	12200	142	28200	103	119000	140	391	7.02	1460	7.66	13200	93.9	367000	450	1890	29	26.9	8.93	26	3.86	393	15.2	15800	73.4	36.7	11.6	30.2	2.9	27.1	2.24	161	3.9	10.3	1.18			59.1	1.2	1030	4.43	18	0.798			8.83	1.4
LC58	-880	10500	131	22100	89.9	95400	123			1890	8.32	10500	80.5	355000	443	1370	24.6	25.2	7.88	19.7	3.56	310	13.2	13500	65.3			27.2	2.73	27	2.1	45.7	2.06	4.09	1.03	4.1	0.596	46.5	1.03	1030	4.28	15.8	0.713	180	17.9	7.61	1.27
LC59	-890	12600	144	30200	106	122000	142			1620	8.08	14300	97.1	344000	432	1930	29	29.7	8.91	23.4	3.65	333	14	16700	73.8					37	2.43	43.2	2.04	4.67	1.12	6.02	0.671	63.4	1.21	1040	4.39	19.4	0.799	180	19.1	5.13	1.32
LC60	-895	12000	140	24900	96.7	102000	129			2330	9.49	11300	85.8	375000	463	1590	27.3			12.5	3.67	390	15	14700	71.2			36.5	3.18	28.8	2.3	45.5	2.13	11.3	1.1	6.78	0.671	52	1.14	1170	4.74	17.3	0.786			5.75	1.41
LC61	-905	11700	139	25400	96.8	110000	133			1390	7.27	11900	86.9	355000	440	1690	26.8	32.3	8.38	16.2	3.52	358	14.1	14300	68			30.3	2.84	31.1	2.3	43.3	2.04	4.7	1.02	6.12	0.661	52.3	1.1	1220	4.68	17.3	0.751
LC62	-910	12600	145	28900	105	121000	143			2030	9.12	13200	94.4	359000	445	1860	28.8	30.7	9.21	20.6	3.98	355	14.7	17700	77.6			37	3.12	26.9	2.37	48.6	2.23	3.42	1.12	8.67	0.754	58.1	1.19	1260	4.92	19.4	0.815			8.63	1.49
LC63	-915	12800	146	30000	106	129000	147			1600	8.15	13800	97	337000	430	1960	29.3	37.3	9.01	26.1	3.78	326	13.9	16600	74.1					31	2.38	53	2.27	7.41	1.11	7.85	0.709	61.2	1.2	1220	4.75	20.6	0.812	166	18.8	7.61	1.48
LC64	-925	13500	149	32700	111	136000	151			1270	7.32	14800	101	310000	406	2220	29.6	55.6	9.18	28.5	3.82	329	13.4	17300	72.5	36.4	11.4	42.5	2.74	35.9	2.32	47.1	2.08	6.52	1.07	7.27	0.673	68.1	1.21	1190	4.51	20.1	0.781			7.48	1.35
LC65	-935	12800	145	29900	106	128000	146	390	7.09	1370	7.48	13900	96.6	349000	435	2080	29.8	39.4	9.29	19.6	3.72	338	14.2	16400	73.9			31.6	2.9	29.7	2.3	46.1	2.13	5.03	1.13	5.63	0.669	59.8	1.19	1180	4.69	19.9	0.804			8.73	1.43
LC66	-945	15100	160	40700	126	160000	169	378	7.24	1250	7.63	18300	118	255000	371	2730	31.5	54.4	9.66	39.6	4.04	299	12.6	21700	79			41.6	2.74	33.8	2.27	54.2	2.14	10.1	1.14	8.23	0.678	84.6	1.3	1040	4.14	20	0.781			8.75	1.45
LC67	-955	14800	156	40900	124	156000	164			1360	7.81	18800	117	253000	364	2730	31.5	48.8	9.78	29.7	3.9	302	12.3	22200	78.2	66.8	12.6	45.1	2.74	39.9	2.4	64.8	2.27	4.99	1.05	8.7	0.67	85.4	1.29	1040	4.07	19.5	0.765	243	18.8	10.3	1.42
LC68	-965	14400	155	37300	119	142000	156	399	7.2	1530	8.2	17600	113	298000	401	2490	31.4	47.5	9.66	31.8	4.01	329	13.6	20300	79.2			40.2	2.77	37.2	2.35	49.1	2.13	12.2	1.17	8.87	0.702	76.3	1.29	1120	4.43	21.3	0.816			7.73	1.48
LC69	-975	11900	140	26800	99.4	107000	132	357	6.64	2740	10.3	13000	91.2	355000	439	1690	27.8			11.7	3.71	375	14.5	16900	73.8	51.9	11.8	32.8	2.92	32.1	2.3	49	2.14	5.89	1	8.26	0.697	56.5	1.14	1140	4.57	18.4	0.773	356	22.4	8.52	1.39
LC70	-985	11200	137	25200	96.4	101000	128	320	6.36	2150	9.02	12000	87	362000	446	1740	27.3	25.7	8.63	17.7	3.67	357	14.1	15400	69.3	66.5	11.8	32	2.93	30.6	2.23	50.9	2.17	10.9	1.11			55.6	1.13	1800	5.71	19.9	0.781
LC71	-1000	10900	135	23400	93.8	98100	126	344	6.64	1890	8.47	10900	83.4	375000	464	1460	26	39.6	8.37	15.7	3.54	327	14.1	13600	68.6			35.2	3.13	32.6	2.32	36.8	1.97	8.11	1.05			49.8	1.11	1290	4.96	19.5	0.797			5.8	1.41
LC72	-1015	13400	149	33900	113	139000	153			1140	6.98	15900	107	308000	409	2400	30.8	46.5	9.48	35.8	3.98	340	13.8	18200	75.2			41.5	2.83	33.6	2.3	175	3.86	10.3	1.14			72.6	1.26	1110	4.44	19.7	0.796			7.84	1.45
LC73	-1025	12300	141	28000	101	114000	136	411	6.96	1300	7.12	13100	91.8	346000	433	1760	27.3	47.3	8.67	27.6	3.83	378	14.6	15700	71					27.5	2.19	43.6	2.06	5.09	0.986	6.89	0.663	56.7	1.13	1090	4.43	17.6	0.757			9.7	1.4
LC74	-1035	15200	161	41900	127	157000	167			1170	7.39	18800	119	271000	382	2690	32.2	53.6	9.93	30.5	3.98	310	12.9	20600	78.5			47.7	2.92	34.5	2.3	61.3	2.33	10.9	1.14	4.08	0.705	84.4	1.32	1050	4.21	20.5	0.8	212	19.2	8.24	1.48
LC75	-1045	10200	130	17100	80.4	74200	109	354	6.53	2220	8.85	7850	69.6	419000	508	980	22.4					398	15.9	12000	65.9	34.6	10.7			30.1	2.2	63	2.56	7.92	1.03	5.65	0.665	35.4	0.978	1140	4.79	17.2	0.773			5.52	1.32
LC76	-1055	10300	131	18000	81.5	77500	110	372	6.52	1640	7.58	8300	70.5	399000	487	1100	22.8			14.7	3.35	362	14.7	11100	61.9			30.2	3.07	24.9	2.22	47.5	2.17			5.93	0.649	38.1	0.983	1190	4.76	16.6	0.742			6.13	1.33
LC77	-1065	12000	140	23800	94.5	98700	127			1600	7.79	10800	83.2	382000	469	1470	26.2					351	14.6	13700	69			24	2.85	26.2	2.36	39.3	2.04			6.28	0.685	50.6	1.13	1290	5.01	18.8	0.803			3.92	1.4
LC78	-1070	11500	137	21500	89.7	91300	121			1580	7.61	9950	78.9	389000	474	1360	25.1			17.8	3.44	360	14.8	12900	66.9					28.6	2.26	34.2	1.93	8.7	1.11	6.19	0.652	44.7	1.06	1240	4.88	18.2	0.778			4.8	1.32
LC79	-1080	13500	148	31700	108	128000	145			1490	7.77	15100	99.9	316000	410	2180	29.4	37.6	9.2	22.2	3.8	384	14.3	18500	74.8	51.3	12.3	35	2.85	36.5	2.35	49.6	2.1	10.5	1.07	7.13	0.669	64.2	1.18	1140	4.47	20.6	0.787			6.56	1.37
LC80	-1090	13800	151	33900	113	139000	153	435	7.31	986	6.44	15500	104	305000	405	2340	30.1	34.7	9.14	36.4	3.86	353	14.1	19200	77.1			40.5	2.79	33	2.32	49.9	2.13	6.35	1.02	6.86	0.655	70.1	1.23	969	4.12	19.6	0.786			7.97	1.38
LC81	-1100	13400	149	33300	112	136000	151	539	7.91	1010	6.51	15500	103	323000	417	2220	30.2	51.1	9.38	29.7	3.88	385	14.6	19400	78.6	42.3	12.3	38.6	2.73	30.1	2.27	38.5	1.98	9.67	1.14	6.9	0.658	69.8	1.25	1000	4.26	21.8	0.822			9.88	1.41
LC82	-1110	16000	165	46500	134	172000	176			1350	8.05	22000	129	204000	327	3190	32	71.7	9.68	46.9	3.98	271	11.5	25800	81.3			42.5	2.56	35.4	2.14	63	2.19	10.2	1.15	3	0.659	100	1.32	808	3.46	21.2	0.76			8.52	1.4
LC83	-1120	16900	171	51700	143	185000	185	349	7.16	1580	9.01	24000	138	199000	328	3510	33.9	111	10.5	50.9	4.13	274	11.8	27900	85.1	69.6	13.6	44.3	2.68	38.3	2.27	74.7	2.44	10.7	1.16	3.29	0.686	111	1.42	734	3.36	22.7	0.804			9.47	1.4
LC84	-1130	10800	134	21200	88.9	82000	115	406	6.83	1530	7.43	9440	76.6	413000	497	1310	25.2	28.3	8.2	17	3.56	400	15.8	13000	68.3					22	2.15	42.4	2.16	4.99	1.06			40.8	1.04	1130	4.77	19.6	0.809			6.25	1.36
LC85	-1160	14800	158	40500	124	158000	166			1080	7.02	19200	118	242000	356	2860	31.3	72.1	9.43	46.7	3.89	284	12	22600	78.1	47.3	12.5	45.8	2.77	45.2	2.36	50.3	2.03	10.9	1.08	8.41	0.638	88	1.29	1010	3.97	20.2	0.762			8.8	1.39
LC86	-1200	11000	135	21700	90.3	82800	116	371	6.66	2730	9.98	9810	78.2	407000	489	1400	25.9					392	15.8	14900	73	56.4	11.6	35.4	3.27	31.7	2.27	58.1	2.48			7.05	0.698	43	1.07	1270	5.04	17.1	0.776			8.38	1.39
LC87	-1220	13000	146	28300	102	110000	135	328	6.55	1160	6.72	13500	93.5	357000	444	1880	28.5			35.8	3.99	362	14.6	15900	72.7	46	11.5	33.5	2.95	25.2	2.18	39.3	1.97	8.09	1.1	6.49	0.659	60.6	1.2	1210	4.76	17.9	0.782			10.3	1.44
LC88	-1270	11100	134	22400	90.4	82400	114			1760	7.91	10300	79.5	373000	464	1390	24.8	28.7	7.95			348	14.1	13400	66.7					28.9	2.17	69.4	2.54	5.67	0.967			44	1.02	1040	4.37	17.3	0.738			6.93	1.31
LC89	-1295	17000	171	48200	139	174000	179	413	7.6	1010	7.13	22200	130	239000	358	3290	34	89.7	10.5	44.9	4.22	293	12.4	24900	83.7	61.4	13.3	46	2.83	34.3	2.23	82.7	2.6	8.33	1.12			96.9	1.38	840	3.7	23.5	0.822			9.26	1.42
LC90	-1335	10900	133	20200	86.8	74300	109	418	6.79	1410	7.04	9130	74.4	395000	489	1180	23.7			21.7	3.51	403	15.5	12100	64.9					26.4	2.11	48.1	2.17	10.4	1.11	6.11	0.666	40.1	1.01	1130	4.68	16	0.749			5.53	1.32
LC91	-1360	14400	153	36300	116	138000	152			1100	6.78	17500	110	287000	388	2470	30.3	41.2	9.26	34.3	3.89	288	12.7	20200	76.4	55.4	12.4	41.1	2.73	35.4	2.27	56.8	2.19	11.9	1.12	8.94	0.683	77.8	1.27	1240	4.56	21.2	0.792			7.46	1.41
LC92	-1390	11500	137	21000	88.3	78100	112	321	6.33	1620	7.59	9610	76.7	399000	488	1290	24.7			19.4	3.56	369	15.1	12500	66	36.4	10.6	19	2.82	27.8	2.21	44.8	2.12	9.62	1.05	5.46	0.634	41.7	1.03	1070	4.56	16.4	0.757			7.59	1.31
LC93	-1410	14300	152	33900	112	127000	146	386	6.95	1420	7.62	15500	105	308000	410	2240	29.8	45.1	9.28	36.2	4.02	344	14	19600	78			43.6	2.82	29.3	2.21	52.4	2.16	10.8	1.14	7.22	0.662	72.8	1.25	923	4.03	17.8	0.777			5.61	1.39
LC94	-1460	11000	135	20700	87.4	75400	109	347	6.33	2840	10	9950	77	374000	465	1320	24.3			11.9	3.37	318	13.5	14500	68.8					31.6	2.17	55.2	2.29	9.51	1.03	7.38	0.67	44.9	1.02	1120	4.53	14.8	0.72			4.3	1.29
LC95	-1480	13800	150	33500	112	124000	144	339	6.75	1280	7.24	14900	103	316000	416	2190	29.8	41.1	9.24	24.8	3.85	285	12.8	17400	74.1			33.3	2.82	33.3	2.34	57.4	2.3	4.48	1.08			67.3	1.21	1130	4.46	17.7	0.763			8.83	1.42
LC96	-1565	11600	137	21200	89	82200	115			1680	7.81	10100	79.7	390000	484	1240	24.5					322	14.2	14000	70					30.1	2.25	46.3	2.22			8.32	0.729	44.2	1.07	1320	5.09	15.7	0.755			4.97	1.38
LC97	-1600	14100	151	33000	110	123000	143	445	7.12	1440	7.62	15800	103	307000	404	2230	29.4	35.7	9.01	29	3.79	394	14.3	20600	77.9	55.9	12.8	38.2	2.69	31.3	2.19	54	2.2	8.86	1.06	4.46	0.691	72.7	1.23	829	3.77	19.4	0.776			6.05	1.32
LC98	-1640	11000	134	20200	87.3	75200	110	366	6.65	1750	7.88	9440	76.3	415000	505	1200	24.4			16	3.63	376	15.6	12400	66.8	33.9	11			28.4	2.4	42.3	2.13	6.96	1.11	6.03	0.68	42.7	1.06	1180	4.88	15.5	0.777			5.16	1.37
LC99	-1660	13700	150	32600	111	125000	144			1640	8.21	15500	102	327000	422	2150	30.4			31.6	3.95	311	13.7	18600	77.4			47.7	3.02	35.1	2.42	58.9	2.36	8.18	1.15	9.2	0.74	68.7	1.25	1220	4.73	18	0.796	172	18	9.37	1.49
LC100	-1710	12300	142	26400	98.4	94600	124	376	6.62	1940	8.5	12500	88.3	359000	445	1720	27.2	37.4	8.65	18.6	3.63	355	14.2	14700	68.9			29	2.81	24.4	2.13	53.7	2.24					53.4	1.11	1030	4.33	18.3	0.767			4.39	1.3
LC101	-1740	21600	193	56400	153	200000	197	456	8.07	1470	9.08	26200	148	167000	305	3570	33.8	125	10.6	70.2	4.43	294	11.8	31300	88.9			50.4	2.8	38.2	2.24	77.6	2.41	13.4	1.16	4.86	0.707	111	1.4	671	3.16	22.9	0.796	189	17.7	10.9	1.44
LC102	-1790	11800	140	21400	89.7	79800	114			2380	9.3	9770	78.1	414000	501	1320	25.7			16.7	3.77	355	15	13900	71.4			35.3	3.39	33	2.38	59.1	2.49	6.72	1.12	6.32	0.714	44.3	1.1	1400	5.34	18.2	0.81			7.25	1.48
LC103	-1805	17800	171	44500	130	165000	170	461	7.56	1290	7.76	20900	125	221000	341	3020	31.7	68.1	9.72	37.4	3.93	315	12.2	25500	81.7	40.5	12.8	44.4	2.62	29.4	2.07	81.1	2.49	7.32	1.07	8.15	0.638	90.5	1.29	733	3.34	20	0.75			8.52	1.34
LC104	-1850	10900	133	17300	80.4	66500	102	364	6.49	1420	6.96	7890	68.9	417000	513	1040	22.9			13	3.31	404	15.8	10600	62					20.9	2.11	40.9	2.13					33.9	0.956	1090	4.65	15.9	0.751			5.27	1.3
LC105	-1880	16100	161	39100	121	144000	157	408	7.2	1230	7.32	17400	114	275000	386	2610	31.5	40.2	9.52	38.7	4.11	325	13.3	20900	78.6			48.4	2.91	35	2.19	58.3	2.25	14.7	1.14	9.5	0.702	80.3	1.28	1130	4.36	20.5	0.794			7.24	1.44
LC106	-1930	11100	135	19600	85.2	72400	107			2380	9.14	8970	73.4	415000	498	1230	24.4			15.6	3.55	375	15.1	11800	64.3					31.1	2.3	51.8	2.35					40.5	1.04	1640	5.68	16.8	0.772			6.46	1.45
LC107	-1950	20900	189	52100	146	188000	189			1350	8.48	24600	142	209000	339	3640	35.1	77.7	10.5	49.8	4.19	276	11.8	28100	87.4			55.1	2.99	48.6	2.44	64.3	2.29	14.4	1.18	12.9	0.745	110	1.45	993	3.98	21	0.811			11.5	1.51
LC108	-1990	11300	137	21200	89.2	85600	118	325	6.46	1740	7.96	9830	78.7	416000	497	1390	26.2					326	14.5	13600	70.4					34.7	2.4	48.4	2.28			7.24	0.713	43.9	1.09	1170	4.87	17.2	0.796			7.85	1.39
LC109	-2005	12100	141	25600	97.4	98600	126			1760	8.14	12000	86.8	373000	457	1730	27.8	26.7	8.71	19.3	3.74	328	13.9	15400	71.5			36	3.12	27.9	2.32	50	2.22	7.86	1.13	7.64	0.699	53.2	1.13	1160	4.66	18	0.783			5.59	1.35
LC110	-2090	11200	136	20300	87.4	85500	117	352	6.61	1370	7.04	9450	76.8	395000	485	1270	24.7			18.8	3.56	301	13.8	11700	64.2					30.4	2.29	37.2	1.95	7.14	1.05	5.39	0.644	42.9	1.04	1100	4.62	15.8	0.757			6.35	1.37
LC111	-2110	11400	137	21600	89.4	90800	121	347	6.49	1510	7.4	10200	79.4	394000	474	1480	26			15.9	3.55	311	13.9	14100	69.5					39.2	2.44	45.2	2.11	8.82	1.02	7.19	0.68	47.2	1.09	1170	4.73	16.3	0.765			4.77	1.35
LC112	-2150	10100	129	16000	77.7	68900	104	306	6.15	1780	7.83	7580	67.7	422000	515	964	21.9					325	14.4	10400	61.4			30.9	3.23	25.3	2.21	35.2	1.94	6.12	1.04			33.5	0.961	1100	4.7	16.4	0.767			3.95	1.3
LC113	-2180	15700	161	41200	125	153000	163			1290	7.61	18800	118	264000	376	2730	32.2	52.7	9.98	30	3.95	288	12.4	21500	79			40.5	2.74	47.9	2.45	67.8	2.39	13.3	1.14	9.25	0.689	86.5	1.32	905	3.88	20.6	0.793	199	18.7	5.16	1.37
LC114	-2210	8940	121	11900	67.3	61300	97.7	338	6.28	1250	6.46	5720	58.5	446000	543	734	19.7					348	15.1	8220	55.4					30.5	2.26	24.1	1.75					27.2	0.895	1210	4.97	18.2	0.746			3.81	1.27
LC115	-2240	14000	152	34900	114	127000	146	430	7.16	2590	10.4	16200	106	297000	397	2420	30.5	55.4	9.51	36.7	3.92	280	12.4	19800	76.6			42.9	2.8	35.6	2.31	73	2.5	12.7	1.14	9.16	0.701	74.6	1.24	967	4.04	19.9	0.779	174	17.9	9.86	1.39
LC116	-2275	9870	127	16100	77.6	69900	105	300	6.16	1440	7.04	7350	66.3	408000	506	975	21.8					294	13.6	9110	57.4			21.6	2.99	29.4	2.2	28.4	1.79					32.5	0.939	1170	4.78	14.4	0.727			6.61	1.32
LC117	-2305	14200	152	35600	116	136000	151			1410	7.72	15400	106	301000	405	2350	30.4	68.7	9.55	29.4	3.78	290	12.6	17900	73.8	40.9	11.7	31.5	2.69	35.8	2.3	60.2	2.28	5.39	1.08	6.13	0.647	73.3	1.24	975	4.1	16.9	0.756			3.76	1.31
LC118	-2340	11400	137	22300	90.6	87600	118	348	6.49	1570	7.53	10400	79.9	396000	477	1460	26.1	25.8	8.2	14.5	3.61	307	13.7	13100	67.3			28.5	3.01	37	2.41	39.8	2.04	9.21	1.08	7	0.675	44.4	1.06	1100	4.58	15.7	0.748			7.33	1.37
LC119	-2390	15700	161	40000	123	150000	161			1000	6.66	17600	115	276000	387	2660	31.8	66.9	9.8	39.6	4.08	272	12.4	19700	76.7			44.2	2.81	35.4	2.31	53.1	2.14	11.2	1.14	9.03	0.695	83.4	1.31	1030	4.17	18.6	0.783			7.81	1.45
LC120	-2420	9960	128	16300	78.2	68200	104	335	6.37	1460	7.11	7600	68	436000	527	1000	22.9					313	14.2	10600	62.9					23.6	2.28	55.1	2.45					34.2	0.99	1330	5.24	15	0.766			5.69	1.38
LC121	-2440	12000	141	24900	95.6	99500	126			1310	7	11800	85.8	367000	450	1620	26.4			21.6	3.56	262	12.5	13500	66.4	33.4	10.6	27.1	2.84	31.4	2.24	53.3	2.24	11.2	1.07			54.7	1.13	1350	4.97	16.6	0.756			6.26	1.39
LC122	-2490	10300	131	19000	83.9	78000	111	284	6.05	2340	9.1	8810	72.7	402000	485	1230	24			13.6	3.51	278	13.2	12000	64.3	41.4	10.5			29.5	2.24	44.6	2.16			5.48	0.646	39.5	1.02	1550	5.46	14.2	0.736			6.07	1.38
LC123	-2520	15300	157	36400	116	134000	150			1480	7.84	17300	110	303000	401	2510	31.3	47.2	9.54	40.7	4.12	288	12.7	19700	77.1	43.8	12.3	40.6	2.76	38.5	2.46	64.3	2.4	6.14	1.15	7.01	0.664	80	1.31	1270	4.69	19	0.789			8	1.45
LC124	-2540	11200	135	20700	87.4	83600	115	643	7.85	1430	7.15	9890	77.2	394000	477	1300	24.5			19.1	3.5	302	13.5	11500	63					32.5	2.26	49.2	2.25			4.38	0.619	43.4	1.05	1330	5.03	16.8	0.757			7.55	1.37
LC125	-2560	14200	154	33400	113	133000	151			1800	8.73	16000	106	315000	412	2440	31.1	58.5	9.57	36.2	3.91	307	13	20800	79.9	42	12.8	48	2.95	31.4	2.26	67.9	2.46	11.2	1.15	8.88	0.694	78.4	1.3	1190	4.59	18.2	0.795			7.44	1.48
LC126	-2600	11600	138	21400	89	83700	116	385	6.7	1730	7.9	10200	78.9	417000	494	1420	26			21.6	3.69	345	14.7	12300	66.1					36.2	2.4	42.7	2.17					47.8	1.12	1420	5.32	17	0.789			7.63	1.48
LC127	-2620	12500	143	26100	97.7	108000	132			1480	7.52	13000	90.9	351000	436	1740	27.1	30.5	8.39	20.6	3.59	278	12.6	14300	67.8	36.1	10.8	28.5	2.74	29.9	2.21	47.8	2.12	10.3	1.09			60	1.18	1440	5.1	16.4	0.747			7.52	1.43
LC128	-2660	10600	132	19100	83.8	74100	108	297	6.04	1730	7.76	9280	74.2	403000	488	1160	23.5			17.5	3.63	306	13.6	12300	64.9					28.9	2.26	52.7	2.29	7.99	1.09	6.24	0.66	41.5	1.03	1180	4.76	16	0.75			5.75	1.35
LC129	-2690	9100	122	12400	67.9	60000	96	269	5.75	1560	7.16	5990	58.9	411000	510	718	18.8					294	13.3	9400	56.4					21.4	2.08	48.5	2.19			5.77	0.651	26.9	0.851	1160	4.69	18.7	0.711			5.56	1.23
LC130	-2715	8920	121	14500	72.6	67900	102	257	5.59	1080	5.98	7530	65.4	367000	463	822	19.2					295	12.7	9300	53.9					30.4	2.07	26.8	1.65			4.34	0.571	32.2	0.864	1040	4.26	13.5	0.658			4.38	1.16
LC131	-2730	19500	183	51400	144	190000	189			1230	8.03	24600	139	194000	321	3520	33.6	83.9	10.2	47.1	4.12	253	11.2	28300	84.6	72.8	13.5	57.3	2.92	38.1	2.25	77.4	2.44	11.6	1.16	2.67	0.666	112	1.41	887	3.64	22.6	0.791			6.97	1.39
LC132	-2760	10000	129	15800	76.2	62000	98.2	422	6.59	1440	6.92	7610	66.4	412000	504	992	21.7			10.3	3.17	309	13.6	10100	58.9	42.2	9.87	24.8	3.07	24.4	2.19	50.9	2.24	5.71	1.04			34.6	0.95	1200	4.79	17.2	0.751			4.56	1.27
LC133	-2785	14500	153	33500	111	127000	144	399	6.92	1260	7.14	15600	104	305000	403	2240	29.7	43.3	9.13	27.5	3.8	294	12.6	19800	76.8	46.6	12.3	43.3	2.87	33.5	2.29	65	2.38	6.07	1.11	7.22	0.664	71.5	1.23	1090	4.32	20.4	0.78			8.77	1.4
LC134	-2805	11900	140	22400	90.7	87300	118	334	6.43	1370	7.02	10200	79.6	394000	477	1370	25.5			16.1	3.61	305	13.6	12300	64.7					27.9	2.13	40.6	2.01	9.86	1.1	5.89	0.647	46.7	1.08	1290	4.95	16.1	0.756			5.65	1.37
LC135	-2840	15900	159	38900	120	145000	156			1420	7.8	18200	115	272000	380	2620	31.1	53.4	9.5	37.9	3.93	269	11.9	21500	78.6			49.5	2.9	38.7	2.35	74.7	2.51	6.87	1.08	6.57	0.645	85.6	1.3	1140	4.32	20.1	0.783			9.09	1.44
LC136	-2870	10700	132	19300	84.2	77500	110	280	6	1790	7.92	9210	74.2	389000	478	1230	23.8	21.6	7.57	14.6	3.31	283	13	11400	62.1			27.4	3.03	24.7	2.25	54.8	2.29			5.55	0.624	40.3	1.01	1410	5.14	13.5	0.712			6.46	1.35
LC137	-2910	13700	149	31000	107	122000	141	427	7.14	1280	7.13	14500	97.8	337000	425	2100	29.4	59	9.3	24.9	3.84	292	12.9	17400	74.5	37.2	11.6	30	2.81	32.2	2.31	60.8	2.35	9.73	1.11	6.75	0.645	67	1.22	1200	4.64	19.9	0.798			8.13	1.42
LC138	-2950	12300	142	25900	97.6	96000	124	357	6.52	1490	7.46	12700	88.9	360000	446	1830	27.9			21.6	3.65	308	13.3	15800	71.3	36.6	11.5	36.9	3.04	32.3	2.33	65.7	2.48	8.13	1.07	8.18	0.701	56.8	1.15	1200	4.68	19.2	0.784			6.68	1.38
LC139	-2970	14600	153	35000	113	135000	149			1130	6.83	16600	107	286000	387	2350	29.4	56.2	9.12	35.6	3.8	252	11.7	18700	73.4	45.8	11.7	41	2.67	37.3	2.3	66.1	2.33	8.42	1.09	3.33	0.674	74.4	1.23	1150	4.34	19.8	0.764			6.8	1.34
LC140	-3000	11300	136	20200	86.1	77400	111	377	6.55	1450	7.13	9690	76.4	392000	480	1290	24.4	39.8	8.08	19.5	3.6	313	13.6	12700	65.4					31.6	2.27	54.8	2.31	5.43	0.984	6.07	0.666	43.4	1.03	1280	4.93	17.8	0.766			5.62	1.35
LC141	-3040	18600	175	46900	135	166000	172	425	7.46	1120	7.32	22200	130	232000	351	3090	32.9	63.2	10.1	47.5	4.18	249	11.4	25100	82.9			45.3	2.74	39.4	2.27	79.5	2.5	11.3	1.18	3.63	0.653	99.7	1.36	817	3.58	20.3	0.781	181	18	9.66	1.44
LC142	-3080	10400	131	16800	78.7	66400	102	282	5.91	2030	8.28	8300	69.9	414000	503	1120	23.1			16.9	3.31	309	13.9	12000	64.4					22.7	2.17	40.4	2.1	7.45	1.08	6.55	0.665	37.3	0.979	1090	4.6	15.4	0.737			6.08	1.28
LC143	-3105	13800	150	31900	109	127000	145			1490	7.78	15000	102	324000	418	2140	29.4	48.2	9.09	36.9	3.94	265	12.4	18900	76.5	47.3	12.2	48.4	2.97	37.2	2.36	51.9	2.14	11	1.1	8.8	0.696	71.8	1.25	1200	4.61	18.1	0.777			7.4	1.43
LC144	-3140	9770	126	14900	74.4	70100	104	392	6.54	1270	6.54	7160	65	406000	499	900	20.8					329	14	9350	56.3					23.1	1.97	28.5	1.78					31.4	0.9	1110	4.56	15.2	0.716			7.9	1.26
LC145	-3160	14500	153	34700	113	133000	149	348	6.66	1150	6.88	16400	106	300000	398	2340	30	51	9.45	29.6	3.92	312	12.9	19600	76.3			40.2	2.67	31.4	2.22	56.8	2.2	9.76	1.12	7.15	0.631	77.6	1.27	1000	4.13	19.1	0.775			5.39	1.34
LC146	-3180	9020	122	13400	70.2	59700	95.9	379	6.39	1390	6.75	6320	60.7	429000	527	792	20.4					273	13.1	8790	55.6					29.6	2.22	44.3	2.15			2.78	0.751	27.4	0.87	1100	4.62	14.1	0.72			6.43	1.27
LC147	-3210	12200	141	24800	95.7	98100	126			1140	6.52	12100	86.9	383000	462	1650	27.3			27.7	3.79	261	12.7	13800	68	39.8	11.2	34.4	3.07	31.4	2.33	36	2.01	9.44	1.12	6.09	0.657	56.7	1.17	1360	5.08	17.2	0.778			8.18	1.47
LC148	-3250	8980	122	13400	70.1	57300	93.7	293	5.85	1370	6.67	6650	61.8	414000	512	795	19.8					258	12.6	8940	55.1					23.8	2.05	33	1.9					31.3	0.915	1310	5	15	0.718			4.84	1.3
LC149	-3270	12200	142	25700	97.1	97500	125	306	6.31	1570	7.68	12300	87.6	374000	455	1720	27.7			21.5	3.74	253	12.4	14300	68.6					35.3	2.3	47.5	2.18	10.4	1.08	8.08	0.706	55.5	1.15	1240	4.81	16.6	0.765			7.39	1.43
LC150	-3290	10500	131	18700	82.8	72700	107	366	6.36	1430	7	8740	71.8	388000	478	1220	23.5			11.6	3.33	279	12.9	11200	61.1					27.9	2.2	35.8	1.86	3.7	0.994	5.08	0.628	40	0.999	1120	4.54	15.5	0.725			4.92	1.24
LC151	-3345	12100	141	26700	98.9	102000	129			1310	7.02	13200	91.2	357000	442	1830	27.9			14	3.54	266	12.4	14800	69.1	34.5	11.1	34.1	2.99	29.2	2.18	48.5	2.13	8.76	1.05	7.15	0.653	57.2	1.15	1160	4.58	17.7	0.763			8.03	1.41
LC152	-3380	10700	133	19300	84.3	74000	108	301	6.13	1670	7.59	9470	75.3	411000	494	1250	24.5					302	13.5	12000	64.6					27.3	2.22	45.3	2.17	10.1	1.08	6.92	0.697	42.4	1.04	1340	5.1	16.8	0.77			6.82	1.38
LC153	-3415	15100	157	38500	120	142000	156			1140	7.01	18800	116	282000	385	2670	31.4	71.8	9.69	47.8	4.06	262	11.9	20400	77.2			44.2	2.82	30.9	2.19	52.5	2.11	9.19	1.14	7.28	0.646	83.5	1.3	983	4.04	19.9	0.779			9.8	1.43
LC154	-3445	10100	128	16300	77.2	61200	97.4	333	6.18	1580	7.25	7510	66.3	411000	508	977	21.8					305	13.7	10800	61					29.5	2.19	38.5	2.02					32.2	0.922	1220	4.83	13.7	0.704			6	1.27
LC155	-3475	14800	155	35300	114	133000	149			1300	7.4	16300	107	307000	405	2410	30.8	46.9	9.47	29.1	3.9	267	12.3	18400	74.4			43	2.82	29	2.25	48.3	2.08	8.92	1.12	8.19	0.671	75.9	1.26	1180	4.51	19.7	0.791			8.66	1.45
LC156	-3515	12700	144	25900	97.5	95100	124	423	6.94	1500	7.47	11800	86.3	384000	465	1680	27.5	34.3	8.66	21.7	3.75	301	13.6	13500	67.9			28	2.89	24.1	2.24	42.2	2.04			1.78	0.66	53.7	1.14	1220	4.8	16.3	0.761			8.89	1.41
LC157	-3620	14500	152	34300	112	116000	138	440	7.09	1660	8.13	15900	105	295000	399	2340	29.7	51.1	9.08	36.4	3.76	276	12.2	18600	73.5			40.3	2.74	31.2	2.17	62.1	2.25	9.56	1.03	9.49	0.685	72.5	1.21	1130	4.32	20.7	0.772			6.41	1.36
LC158	-3640	9990	129	17100	79.4	65700	101	420	6.64	1700	7.59	8220	69.2	412000	502	1090	23	22.3	7.45	12.4	3.33	284	13.2	10700	61					25.7	2.08	40.9	2.05	6.76	1.05	4.76	0.631	33.8	0.95	1270	4.94	15.5	0.733			7.35	1.33
LC159	-3680	14000	150	31200	107	121000	141			1280	7.12	15000	101	330000	422	2140	29.5	38.8	9.07	25.6	3.81	260	12.3	16600	72	48.4	11.6	28	2.64	30.7	2.22	49.4	2.15	7.12	1.13	6.77	0.669	68.4	1.23	1250	4.69	18.1	0.77			6.49	1.38
LC160	-3745	10400	130	16600	77.7	60700	96.9	351	6.16	1490	7	8180	68.4	402000	496	1100	22.6			12.5	3.27	327	13.8	11100	61.4					22.3	2.07	44.7	2.07	6.19	1.01			37.3	0.978	1300	4.96	13.9	0.712			4.95	1.31
LC161	-3795	14800	155	35500	115	135000	151			1260	7.28	16300	110	302000	408	2300	30.4	31.3	9.11	32.8	3.86	237	11.8	17700	74.6			48.8	2.99	35.5	2.26	55.1	2.27	12.7	1.12	7.74	0.668	74.9	1.29	1430	5.01	17.7	0.776			8.66	1.52
LC162	-3815	10600	131	16500	78.6	64200	100	365	6.49	1800	7.84	7390	66.4	414000	512	918	21.2					289	13.4	9840	59.7					29.1	2.18	38.7	2.04			3.85	0.607	32.9	0.954	1450	5.34	14.6	0.725			6.24	1.35
LC163	-3875	16900	168	45900	133	163000	171			1960	9.65	22000	127	230000	347	3090	32.2	61.4	9.7	41.1	4	241	11.1	23800	79.3	66.8	13.1	45.3	2.72	38.9	2.28	68.1	2.35	10.8	1.12	2.45	0.673	98.3	1.35	1100	4.14	22.7	0.792			6.44	1.39
LC164	-3905	13100	147	28300	103	102000	130			2570	10.1	13600	94.6	392000	471	1840	29.6	27.6	9.23	20.7	3.92	279	13.5	16500	76.9	47.9	12.4	36.3	3.27	35.9	2.48	56.3	2.46	10.6	1.15	7.73	0.745	59.2	1.24	1570	5.63	19.4	0.834			5.86	1.53
LC165	-3950	12100	142	26800	100	104000	131			1740	8.2	12200	89.2	377000	461	1780	28.2	33.7	8.79	21.5	3.66	269	12.9	14300	70.4					28.3	2.34	47.1	2.18	8.64	1.12	6.63	0.675	55.4	1.17	1240	4.89	16.1	0.779			6.98	1.48
LC166	-3985	12000	140	25200	96.2	96700	125	309	6.33	1380	7.19	11800	86	389000	466	1660	27.5	35.8	8.76	22.9	3.8	274	13.1	13600	67.8	34.9	11.1			29.1	2.35	40.8	2.02	3.4	1.07			54.4	1.16	1490	5.35	17.6	0.781			5.76	1.44
LC167	-4045	13600	149	34700	114	130000	147	378	6.93	1300	7.32	15800	106	300000	404	2260	29.7	48.2	9.05	31.5	3.81	254	12	17800	73.9			37.9	2.65	32.6	2.22	64.3	2.36	8.07	1.1	6.3	0.641	73.1	1.25	1140	4.42	17.3	0.76			7.66	1.4
LC168	-4075	11900	141	24800	95.4	89200	120	391	6.78	2610	9.81	11900	86.1	379000	464	1620	27.2	38.8	8.69	13.6	3.68	294	13.2	15000	71.2	36.8	11	35.7	3.12	29.7	2.34	52	2.26	7.17	1.08	7.64	0.689	50.1	1.1	1220	4.78	17.1	0.765			7.34	1.36
LC169	-4120	14100	152	34400	114	130000	148	369	6.95	1580	8.14	15900	106	323000	419	2250	30.2	41.8	9.28	41.1	4.08	278	12.7	18500	76.6	53.4	12.2	42	2.89	30.2	2.32	63.5	2.42	8.18	1.11	8.2	0.688	72.6	1.28	1290	4.83	19.8	0.802			8.21	1.45
LC170	-4155	13200	146	26700	99.8	97200	126	333	6.53	1470	7.46	12500	89.8	382000	465	1660	27.5	26.5	8.68	17.8	3.69	292	13.5	14300	70.5					28.8	2.21	59.5	2.42	11.8	1.1	6.35	0.657	57.4	1.19	1270	4.98	15.8	0.78			5.18	1.4
LC171	-4190	16000	160	40200	122	147000	158			1150	7.06	19700	118	267000	374	2830	31.9	69.2	9.85	39.9	3.98	274	12.1	21800	78.1	61.6	12.9	42.4	2.82	33	2.2	64	2.29	9.37	1.07	2.76	0.69	88.6	1.33	1250	4.54	18.7	0.769			6.68	1.43
LC172	-4230	11700	138	21200	88.3	79200	112	296	6.17	2100	8.63	9960	77.9	413000	492	1380	25.9			12.7	3.67	289	13.4	12900	67.2					34.4	2.34	48	2.21	8.82	1.09	6.89	0.7	45	1.08	1500	5.44	17.3	0.782			5.62	1.41
LC173	-4260	15400	160	40100	124	152000	162			1260	7.53	18400	118	269000	382	2630	31.3	50.2	9.5	29.9	3.84	258	12.4	21000	78.8			45.6	2.84	43.1	2.39	59.3	2.25	15.7	1.14	3.56	0.698	82.9	1.31	1360	4.78	19.5	0.78			11.4	1.49
LC174	-4295	10300	130	17200	80.4	73500	108			1540	7.34	8440	71.3	407000	498	1070	22.8	21.5	7.36	11.9	3.18	258	12.8	10200	60.4					30.2	2.26	31.1	1.87					36.5	0.997	1530	5.48	14.4	0.729			8.69	1.41
LC175	-4330	12300	143	25500	97.2	104000	130	436	7.1	1400	7.32	12800	90.4	382000	460	1720	27.8			19.9	3.7	312	13.9	14800	70.6					27.3	2.27	45.9	2.17	10.7	1.16	6.52	0.67	55.4	1.16	1210	4.82	18.7	0.804			6.77	1.4
LC176	-4360	12500	144	26400	99.6	105000	131			1760	8.26	12600	90.6	380000	462	1730	28.1			22.1	3.79	296	13.6	14400	70.9			26.2	2.94	25.4	2.28	46.4	2.22	7.55	1.14	6.72	0.672	56.1	1.18	1370	5.16	17	0.786			9.08	1.48
LC177	-4370	12500	144	27000	101	111000	135			1740	8.29	13000	92.3	367000	451	1690	27.8	32.8	8.85	20.7	3.88	284	13.3	15000	71.6					29.8	2.36	44.2	2.1	6.95	1.09			57.6	1.18	1350	5.08	18.2	0.793	119	18	7.01	1.45
LC178	-4400	10700	134	21100	88.2	85000	116	420	6.77	1560	7.49	10500	79.5	381000	465	1400	25			18.2	3.39	310	13.4	12100	63.3					23.7	2.15	46.5	2.14	8.2	1.03			46.4	1.06	1120	4.55	16.6	0.749			6.43	1.3
LC179	-4440	15100	158	40200	123	155000	164			1140	7.18	18900	119	253000	369	2510	30.6	64.1	9.49	34.7	3.81	270	11.9	20700	76.4	40.6	12.3	41.8	2.68	36.9	2.18	57.5	2.18	10.6	1.08	3.26	0.674	84.8	1.28	1040	4.1	19.7	0.77	227	18.5	7.47	1.4
LC180	-4470	11200	136	20300	87.4	86100	118	400	6.85	1360	7.04	9190	75.8	408000	492	1200	24.3	23	7.93			334	14.4	11100	63.4					29.8	2.26	46.5	2.23	8.65	1.04	5.07	0.641	42.2	1.06	1340	5.16	17.7	0.783			5.37	1.39
LC181	-4505	11200	136	20900	87.7	87000	118	399	6.71	1400	7.12	9740	77.1	386000	471	1310	24.4			18.9	3.49	309	13.5	11700	62.5			25.9	2.89	26.3	2.1	38.5	1.99	8.07	1.06	6.43	0.663	42.7	1.02	1260	4.83	17.8	0.755			6.33	1.34
LC182	-4545	11200	135	20600	87.8	87700	119	328	6.48	1340	6.98	9500	77.2	389000	481	1240	24.5			12.4	3.45	296	13.6	11000	62.3					17.1	2.03	54.3	2.33	5.95	1.05	5.23	0.64	42.8	1.05	1330	5.07	15.9	0.754	111	17.7	5.19	1.38
LC183	-4575	15700	161	37400	120	148000	160			1310	7.64	17500	115	280000	390	2420	30.3	66.1	9.48	34.8	3.94	260	12	19100	75.3			45.8	2.82	35.2	2.2	58	2.26	13.8	1.09	7.6	0.664	81.2	1.29	1290	4.68	18.9	0.775			7.21	1.43
LC184	-4605	10800	134	19500	85.1	82800	115	383	6.61	2370	9.2	9640	76.6	392000	476	1260	24.1			14	3.48	328	14.1	13000	66.4			32	3.06	24.9	2.15	88.8	2.91					42.7	1.04	1300	4.97	15.9	0.748			7.11	1.37
LC185	-4645	15300	162	41900	128	164000	171			1630	8.84	20100	123	247000	363	2900	32	66.8	9.7	47.1	3.98	251	11.6	22800	80.2	54.2	12.7	46.7	2.82	38.3	2.29	70.9	2.39	12.5	1.1	3.63	0.691	90.1	1.33	1090	4.22	18.7	0.768			7.11	1.41
LC186	-4670	10900	135	19400	85.9	81600	115	308	6.43	4160	12.4	9300	76.2	408000	493	1210	24.1			9.38	3.38	311	13.9	11200	63.4					33.8	2.32	43	2.15					41.7	1.06	1490	5.44	16.2	0.769			7.79	1.43
LC187	-4700	17500	172	45400	134	174000	178			1320	8.07	21500	130	234000	357	3040	32.7	102	10.1	50.5	4.13	255	11.6	23700	82			44.5	2.73	37.3	2.31	70.5	2.42	12.1	1.15	2.4	0.654	93.1	1.34	1060	4.13	20.6	0.782			13.1	1.52
LC188	-4740	11700	139	21200	89.4	83500	116	377	6.8	2260	9.14	10100	79.6	411000	496	1310	25.6	29	8.25	10.2	3.56	313	14.3	13100	69.3			38	3.32	27.1	2.31	52.7	2.34	6.07	1.08			42.8	1.08	1460	5.43	18	0.796			7.67	1.46
LC189	-4775	15900	165	41100	127	160000	170	401	7.46	2030	9.86	19200	121	256000	372	2720	31.5	89.9	9.99	46	4.11	267	12.1	23600	82.8	47.3	12.9	44.2	2.87	36	2.3	86.4	2.69	12	1.12	7.81	0.659	86.7	1.33	1190	4.45	20.5	0.795			8.24	1.45
LC190	-4805	10500	131	18600	83.6	78700	112	316	6.4	1870	8.17	8730	73.6	407000	497	1140	23.5					327	14.2	11200	63.4					30.4	2.24	58.1	2.41	9.35	1.1	6.81	0.689	38.7	1.03	1590	5.61	17.4	0.774			4.11	1.36
LC191	-4840	14500	155	34500	115	141000	156			1470	8.03	16200	110	303000	408	2180	29.5	63.2	9.25	28.9	3.73	257	12.2	17900	74.6			40.3	2.78	29.6	2.28	64.3	2.39	9.66	1.13	7.85	0.68	73.2	1.26	1460	5.07	19.4	0.794			8.69	1.49
LC192	-4875	14100	151	29100	104	103000	131	525	7.63	1640	7.99	13900	95.1	372000	456	1860	28.9	32.8	9.25	20.7	3.94	344	14.5	15800	73.7	41.3	11.7			33.7	2.41	58.8	2.39	11.3	1.19	6.61	0.679	60.1	1.22	1340	5.1	18.8	0.815			8.5	1.49
LC193	-4900	13300	147	24200	95.4	99200	127	364	6.81	1670	7.98	11900	87.8	388000	471	1510	26.8					351	14.8	13700	69.9			29.6	3.13	31.8	2.28	44.2	2.1	7.92	1.09	6.88	0.718	55	1.18	1650	5.7	20.1	0.826			4.57	1.48
LC194	-4935	12700	144	27000	101	111000	135	390	6.97	1590	7.91	12900	91.8	359000	446	1680	27.4	38.7	8.73	22.9	3.8	330	14	14800	70.7			30.4	2.88	30.3	2.28	54.7	2.31	6.44	1.02	5.21	0.644	56.4	1.17	1550	5.4	19.1	0.797			7.71	1.47
LC195	-4970	15400	162	37500	121	149000	162			1440	8.11	17500	114	293000	399	2470	31.5	69.1	9.87	32.2	3.91	274	12.5	19300	77			39.7	2.76	37.4	2.33	64.5	2.37	12.6	1.13	6.89	0.676	76.6	1.28	1310	4.77	19	0.791	159	18	7.98	1.48
LC196	-4990	11700	139	25600	98	109000	134	349	6.74	1600	7.9	12200	89.3	372000	455	1680	27.6	26.6	8.52	15.1	3.57	317	14	13900	69	37.3	11	28.5	2.97	30.6	2.33	53.2	2.33	8.55	1.07	5.71	0.642	53.8	1.16	1590	5.51	19.5	0.81			7.25	1.44
LC197	-5020	15800	164	39400	124	153000	165	568	8.3	2350	10.4	18500	117	267000	378	2590	30.9	46.6	9.49	31.2	3.97	299	12.8	22800	81.7	54	13	46.6	2.9	37.2	2.34	81.1	2.66	7.92	1.15	3.17	0.701	82.7	1.3	1290	4.67	22.2	0.813			8.3	1.45
LC198	-5065	14700	154	32100	109	112000	136	498	7.62	1750	8.39	15100	101	352000	442	2020	30.3			32.6	4.18	312	13.8	17700	76.7	51.2	12.3	46.2	3.06	30.8	2.39	86.7	2.89	9.74	1.17	8.3	0.735	65.5	1.24	1400	5.15	20.9	0.833	167	18.9	7.22	1.47
LC199	-5110	14700	156	34700	115	141000	155			1670	8.53	16500	109	301000	403	2230	30.2			26.2	3.83	259	12.2	18000	74.6	50.8	12.1	39.3	2.77	40.3	2.43	55.9	2.24	11.1	1.08	7.68	0.672	77.2	1.31	1660	5.4	19.3	0.796	176	17.9	7.89	1.51
LC200	-5155	12700	143	22900	92.5	82000	115	416	6.92	1920	8.37	10900	82.5	404000	488	1450	26.4			17.2	3.64	330	14.6	12600	67.1					29.2	2.19	59	2.44	11.8	1.13	5.47	0.653	46.1	1.11	1390	5.25	17.7	0.793			6.23	1.43
LC201	-5210	19500	182	50800	142	181000	183	675	9.15	1360	8.35	24000	137	209000	336	3370	33.5	77.7	10.1	53	4.11	289	12	25800	82.8	59.7	13.2	39.5	2.62	40.5	2.2	84.1	2.51	15.9	1.17	2.34	0.648	105	1.39	787	3.49	23.4	0.808			8.55	1.4
LC202	-5240	13200	146	25500	97.9	93500	124	464	7.27	2180	9.08	11900	87.4	383000	470	1550	26.7	36.8	8.49	31.6	3.97	339	14.3	14900	71.8	41.9	11.5	35.1	3.17	30.4	2.22	58.8	2.46					50.9	1.13	1180	4.79	18.3	0.797			7.34	1.38
LC203	-5290	16200	166	42300	129	160000	170			1460	8.32	19400	122	274000	385	2740	32.1	57.3	9.81	46.7	4.2	265	12.1	20200	77.9			42	2.84	32.3	2.23	62.2	2.37	6.14	1.15	7.19	0.689	89.4	1.36	1500	5.07	19.6	0.8			10.7	1.57
LC204	-5320	14000	151	31200	108	116000	139			2280	9.62	15100	100	351000	440	2050	29.9	48.2	9.32	22.9	3.81	291	13.5	17000	76			36.2	3.06	29.8	2.35	67.8	2.57	8.87	1.15	7.84	0.71	63.7	1.24	1760	5.79	18.8	0.808			10	1.57
LC205	-5355	13600	149	32200	109	134000	149			1580	8.1	15600	104	324000	415	2190	29.6	30.2	8.95	33.8	3.86	296	12.8	16000	70.5			44.2	2.94	36.6	2.26	39.2	1.93					69.9	1.24	1650	5.4	19.3	0.783			6.92	1.47
LC206	-5370	10800	133	20800	88.7	91900	122	403	6.98	2120	8.91	9660	78.4	410000	491	1210	24.4			15.5	3.64	300	14	11300	64.4					23.8	2.22	52.5	2.38			6.49	0.683	40.9	1.07	1630	5.73	17.1	0.778			9.71	1.49
LC207	-5415	13600	149	31900	109	128000	146			1480	7.83	14600	103	318000	420	2000	28.5	51.9	8.92	21	3.64	261	12.2	15600	70.1	44.5	11.2	38.7	2.72	29.7	2.18	48.7	2.12	6.85	1.09	6.65	0.663	65.5	1.21	1600	5.33	17.2	0.758			7.21	1.45
LC208	-5430	10400	132	19200	84.5	85400	116	315	6.3	1570	7.5	9220	75	409000	489	1200	24.1			11.5	3.48	313	13.8	10700	61					25.4	2.26	45.7	2.18					42	1.05	1590	5.58	17.2	0.774			7.02	1.45
LC209	-5480	15400	161	40700	126	158000	167			1470	8.24	19900	122	264000	377	2720	31.6	68.4	9.69	42.5	3.95	271	12.1	20000	76.3			46.3	2.82	33.9	2.26	59.4	2.27	9.84	1.12	8.15	0.655	87.5	1.33	1290	4.63	19.3	0.781			9.61	1.49
LC210	-5500	11900	139	23500	93.8	88500	120	438	7.08	1890	8.36	11300	84.3	395000	479	1500	26.6	28.9	8.52	21.2	3.7	289	13.6	13700	69.7	40.3	11.2	34.1	3.21	27.5	2.18	84.9	2.93			8.45	0.723	48.6	1.11	1280	5.02	18	0.792			5.02	1.38
LC211	-5550	17700	173	48500	138	176000	180	404	7.45	1530	8.75	23800	134	223000	343	3190	33.1	55	9.97	42.1	4.02	271	11.8	24500	80.7	50.3	13.1	39.5	2.62	33.5	2.21	89.1	2.61	11.1	1.18	2.61	0.678	105	1.39	863	3.66	22.7	0.802	217	18.6	7.44	1.39
LC212	-5575	13300	147	27100	101	100000	128	437	7.16	1770	8.26	12900	91.4	375000	460	1740	27.9	44.9	8.76	24.3	3.66	306	13.7	14700	71.5			35.9	3.14	24.8	2.2	68.3	2.55	8.93	1.13	7.39	0.705	56.7	1.18	1120	4.64	17.4	0.786			8.87	1.43
LC213	-5620	13600	148	33300	110	126000	144	393	6.85	1470	7.67	15600	104	289000	391	2160	28.3	64.8	8.86	29	3.59	256	11.6	16800	69.5	34.7	10.9	36.9	2.53	34.6	2.17	60.2	2.23	10.6	1.05	6.03	0.594	68.5	1.17	945	3.92	18.1	0.729			9.29	1.32
LC214	-5640	9790	127	14300	72.7	63900	99.2	273	5.87	1690	7.49	6760	62.7	416000	511	817	20.1			14.7	3.2	266	12.7	9350	56.9	41.9	9.21	26.5	3.03	24.6	2.19	54.2	2.3					28.8	0.88	1160	4.71	14	0.697			4.52	1.23
LC215	-5690	13400	149	32200	110	132000	149	416	7.27	1650	8.36	15500	103	332000	424	2150	30.1	32.2	9.19	26.9	3.89	268	12.8	16400	73.1			41.5	2.86	33.9	2.4	44.4	2.05	6.65	1.12	6.3	0.671	67.4	1.25	1430	5.13	19.1	0.799			9.78	1.49
LC216	-5700	12100	141	25900	98.5	104000	131	390	6.94	1620	7.89	12300	89.2	383000	464	1640	27.6	42.9	8.86	25.4	3.79	287	13.3	13200	67.8	35.3	10.9	35.5	3.23	34.1	2.32	45.9	2.19	10.8	1.11	6.63	0.677	53.3	1.15	1360	5.15	16.9	0.783			7.95	1.43
LC217	-5745	13000	146	29300	104	124000	143			1430	7.6	14400	97.3	357000	438	1970	29.2	46.9	9.21	24.6	3.86	269	12.9	15100	70.5	40.4	11.5	36.2	2.96	28.4	2.27	49.2	2.21	6.39	1.08	6.64	0.679	63.7	1.22	1410	5.12	18.4	0.795			5.81	1.45
LC218	-5770	10600	132	19900	86.5	89700	120	303	6.35	1630	7.71	9250	76.2	404000	487	1230	24.2	22.9	7.9	10.5	3.39	295	13.6	10700	61.9			29.1	3.07	27.2	2.16	34.5	1.97			5.4	0.655	42.9	1.06	1400	5.24	16.3	0.768			6.36	1.39
LC219	-5830	14300	154	36200	118	142000	157			1820	8.94	16900	111	305000	406	2430	31	54.1	9.55	38.2	4.05	245	12.1	18200	75.6	39.6	11.9	37.9	2.81	37.9	2.47	63.7	2.36	9.09	1.11	7.59	0.664	74.4	1.28	1320	4.82	18.7	0.787			10.9	1.51
LC220	-5840	11800	140	26600	99.1	108000	132			1730	8.17	12900	90.3	366000	447	1810	28.1			28.7	3.86	298	13.3	14400	68.9	45.8	11.3	30.8	2.97	31.5	2.25	57.1	2.37					57.6	1.17	1400	5.1	18.1	0.788			5.08	1.39
LC221	-5895	15600	163	43200	130	164000	172			1530	8.56	20300	124	264000	376	2850	32.8	71	10.1	46.8	4.21	268	12.3	21300	79.1	41.1	12.6	47.7	2.86	42.4	2.56	64.7	2.41	8.33	1.18	5	0.742	90	1.36	1140	4.39	20.6	0.804	187	18.3	8.54	1.46
LC222	-5920	11800	139	24700	96.3	99100	127	418	7.06	1390	7.24	11500	85.8	398000	477	1520	26.8	26.8	8.48	17.3	3.61	260	13.1	12400	66.6					27.2	2.31	48.3	2.27	6.67	1.09			51.1	1.16	1350	5.18	17.5	0.793			5.99	1.39
LC223	-5970	12100	141	28900	103	120000	140			1270	7.05	13900	95.3	335000	425	1920	28.3	41.3	8.74	18.9	3.61	258	12.3	14800	68.3			34.6	2.93	34.5	2.29	51.1	2.18	9.09	1.05	8.38	0.68	61.1	1.17	1450	5.07	16.9	0.75			9.62	1.44
LC224	-5990	11300	137	23700	94.5	100000	128			1400	7.3	11100	84.3	396000	476	1450	26.6			12.9	3.59	270	13.3	11900	65.1			30.4	3.07	29.9	2.41	47.9	2.21			5.34	0.66	49.9	1.13	1490	5.42	15.7	0.777	111	18.2	6.71	1.45
LC225	-6070	13100	148	30900	108	125000	145			2170	9.47	14600	99.4	346000	434	2000	29.7	52.1	9.46	23.9	3.87	274	13	18000	77.3	39.4	12.4			34	2.38	75.4	2.67	9.41	1.15	11.2	0.783	64.2	1.23	1290	4.92	18.5	0.802	151	19.1	5.9	1.44
LC226	-6150	12700	145	28100	102	113000	136	336	6.65	1960	8.78	13200	92.5	361000	444	1840	28.2	44.8	8.98	20.6	3.75	318	13.5	14900	70			34.7	3.01	35	2.33	78.7	2.73			2.06	0.664	57.7	1.17	1340	4.99	18.9	0.792			8.75	1.46
LC227	-6195	16500	167	44900	133	172000	177	409	7.55	1170	7.55	21000	128	241000	360	3000	32.7	70.1	9.87	49.8	4.15	285	12.3	22100	79.1	45.5	12.5	42.7	2.73	33.5	2.18	54.6	2.14	11	1.08	8.39	0.659	94.7	1.35	1070	4.17	20.1	0.788			8.93	1.44
LC228	-6220	13600	148	24900	96.5	89200	120	383	6.8	1710	7.99	11800	86.5	379000	469	1530	26.7	48.4	8.64	16	3.54	328	14.4	14200	69.6			36.8	3.16	31.5	2.23	55.2	2.35	10.7	1.1	7.98	0.703	50.9	1.13	1320	5.03	19	0.797			5.59	1.37
LC229	-6270	18900	182	53000	147	199000	195			2380	11.4	27100	146	163000	295	3620	33.1	82.7	10.2	55.5	4.06	259	10.6	29500	81.9	57.2	13.7	51.2	2.7	37.5	2.13	68.1	2.16	10.9	1.11	9.82	0.644	117	1.38	836	3.42	21.4	0.753	234	17.9	4.44	1.28
LC230	-6320	20800	181	46100	131	151000	161	600	8.25	1640	8.57	22000	129	242000	361	3000	32.7	61.4	9.84	43.8	4.07	327	13	24700	83.4	42.6	13	45.7	2.78	33.6	2.18	89.6	2.66	12.6	1.12	11.3	0.734	95.1	1.36	991	4.01	21.8	0.804			6.84	1.4
LC231	-6380	21200	184	45800	132	150000	162	733	9.09	1260	7.58	21000	128	260000	378	2940	33.4	77.5	10.3	34.1	4.15	379	14	24300	84.8			45.6	2.79	30.3	2.19	79.2	2.55	12	1.14	11.2	0.744	88.8	1.34	958	4.01	21.3	0.805			12.2	1.5
LC232	-6430	13700	148	25300	96.4	90300	120	397	6.69	1680	7.85	12500	87.9	373000	456	1680	27.2	33.2	8.54	23.7	3.73	389	14.9	15600	71.4					29.4	2.17	96.4	3	10.5	1.09	8.19	0.712	52	1.12	1340	5	18.4	0.775			7.32	1.4

## Sheet: δ13C(VPDB)
strat position (cm)	sample ref	δ13C(VPDB) (‰)
1555	1550-1560	-23.0626
1450.22	LCM-1	-22.6788
1443.26	LCM-2	-22.4297
1429.35	LCM-4	-22.3795
1422.39	LCM-5	-22.9854
1415.43	LCM-6	-22.5689
1408.48	LCM-7	-22.5023
1405	1400-1410	-22.3675
1401.52	LCM-8	-22.719
1394.57	LCM-9	-22.9664
1387.61	LCM-10	-22.5961
1380.65	LCM-11	-23.0376
1373.7	LCM-12	-22.4252
1366.74	LCM-13	-22.6538
1359.78	LCM-14	-22.7007
1352.83	LCM-15	-23.5545
1345.87	LCM-16	-22.665
1345	1340-1350	-22.3386
1338.91	LCM-17	-23.1793
1331.96	LCM-18	-23.5372
1325	LCM-19	-23.2545
1318.04	LCM-20	-22.9358
1311.09	LCM-21	-24.5915
1304.13	LCM-22	-23.8438
1297.17	LCM-23	-23.5267
1290.22	LCM-24	-23.8646
1283.26	LCM-25	-23.8179
1276.3	LCM-26	-23.8506
1269.35	LCM-27	-23.4091
1262.39	LCM-28	-23.3027
1255.43	LCM-29	-22.3954
1248.48	LCM-30	-23.458
1245	1240-1250	-24.0239
1241.52	LCM-31	-23.5603
1234.57	LCM-32	-23.6666
1227.61	LCM-33	-23.7011
1220.65	LCM-34	-24.1302
1213.7	LCM-35	-23.9171
1206.74	LCM-36	-23.5528
1199.78	LCM-37	-23.1564
1192.83	LCM-38	-23.188
1178.91	LCM-40	-23.2155
1171.96	LCM-41	-22.9076
1165	LCM-42	-23.3008
1158.04	LCM-43	-23.7949
1144.13	LCM-45	-23.367
1135	1130-1140	-23.6087
1045	1040-1050	-23.3647
945	940-960	-23.6297
885	880-890	-23.9632
815	810-820	-22.7463
775	770-780	-22.3901
735	730-740	-23.4522
685	680-690	-23.6134
645	640-650	-24.1025
615	610-620	-22.7559
575	570-580	-23.8487
545	540-550	-23.9231
515	510-520	-24.3427
485	480-490	-23.8508
455	450-460	-23.6988
430	425-435	-24.0796
390	385-395	-24.2016
360	355-365	-24.624
332.5	330-335	-25.2332
315	310-320	-24.9973
292.5	290-295	-24.3089
277.5	275-280	-24.2604
255	250-260	-24.3251
227.5	225-230	-23.6438
205	200-210	-23.8786
187.5	185-190	-24.0251
170	165-175	-24.7357
145	140-150	-24.6009
115	110-120	-24.6615
95	90-100	-23.2118
67.5	65-70	-22.942
52.5	50-55	-22.4859
27.5	25-30	-23.2305
5	0-(-10)	-22.2788
-45	(-40)-(-50)	-22.6163
-75	(-70)-(-80)	-23.2902
-105	(-100)-(-110)	-22.5071
-135	(-130)-(-140)	-23.1725
-170	(-165)-(-175)	-22.979
-200	(-195)-(205)	-23.0298
-245	(-240)-(-250)	-22.863
-280	(-270)-(-290)	-23.486
-280	LC-1	-23.3856
-310	LC-4	-22.7695
-350	LC-7	-24.5095
-385	LC-10	-24.0302
-415	LC-13	-23.8251
-450	LC-16	-23.486
-480	LC-19	-23.4544
-510	LC-22	-23.3375
-570	LC-28	-23.2941
-605	LC-31	-23.0781
-625	LC-33	-23.7638
-645	LC-35	-23.5991
-665	LC-37	-23.5959
-700	LC-40	-23.2374
-725	LC-43	-23.4021
-748	LC-46	-23.2526
-770	LC-48	-24.3812
-790	LC-50	-22.7386
-810	LC-52	-23.4677
-840	LC-55	-23.3944
-880	LC-58	-23.9252
-905	LC-61	-23.4002
-925	LC-64	-23.6206
-955	LC-67	-23.3468
-975	LC-69	-24.1427
-985	LC-70	-23.0696
-1025	LC-73	-23.7667
-1055	LC-76	-23.8489
-1080	LC-79	-23.9203
-1110	LC-82	-24.1582
-1160	LC-85	-23.899
-1270	LC-88	-24.2925
-1360	LC-91	-22.4041
-1460	LC-94	-23.2413
-1600	LC-97	-23.7847
-1710	LC-100	-22.9774
-1805	LC-103	-23.2077
-1930	LC-106	-24.2614
-2005	LC-109	-23.7586
-2110	LC-111	-24.6094
-2340	LC-118	-23.8583
-2440	LC-121	-23.1851
-2490	LC-122	-22.8482
-2520	LC-123	-22.784
-2540	LC-124	-23.5949
-2560	LC-125	-22.9909
-2600	LC-126	-23.0922
-2620	LC-127	-22.9686
-2660	LC-128	-23.0225
-2690	LC-129	-23.2835
-2715	LC-130	-23.7811
-2730	LC-131	-22.842
-2760	LC-132	-22.7791
-2785	LC-133	-23.3558
-2805	LC-134	-22.9055
-2840	LC-135	-22.9864
-2870	LC-136	-22.8175
-2910	LC-137	-23.1495
-2950	LC-138	-23.2712
-2970	LC-139	-22.6964
-3000	LC-140	-23.267
-3040	LC-141	-23.0224
-3080	LC-142	-23.5671
-3105	LC-143	-22.9153
-3140	LC-144	-23.4035
-3160	LC-145	-23.2774
-3180	LC-146	-23.6002
-3210	LC-147	-22.1676
-3250	LC-148	-23.1504
-3270	LC-149	-22.9391
-3290	LC-150	-23.233
-3345	LC-151	-22.5565
-3415	LC-153	-22.594
-3445	LC-164	-23.6351
-3475	LC-155	-22.5621
-3515	LC-156	-23.6857
-3620	LC-157	-23.4744
-3640	LC-158	-23.0973
-3680	LC-159	-22.7212
-3745	LC-160	-23.3702
-3875	LC-163	-22.916
-3985	LC-166	-23.8043
-4075	LC-168	-23.6625
-4190	LC-171	-22.9711
-4230	LC-172	-23.8814
-4330	LC-175	-22.8755
-4400	LC-178	-23.9408
-4505	LC-181	-23.3889
-4605	LC-184	-22.9709
-4805	LC-190	-22.9863
-4935	LC-193	-22.2091
-4990	LC-196	-22.5495
-5110	LC-199	-21.8188
-5240	LC-202	-23.6758
-5355	LC-205	-22.3509
-5430	LC-208	-22.4358
-5550	LC-211	-22.9102
-5620	LC-213	-22.1599
-5640	LC-214	-23.3676
-5745	LC-217	-22.2331
-5840	LC-220	-22.5442
-5970	LC-223	-22.215
-6150	LC-226	-21.834
-6270	LC-229	-22.313
-6430	LC-232	-22.864
